# Supplementary material
Source: PubMed Central journal article supplement (PMC2929920)
Supplement: NIHMS223481-supplement-1_si_001.pdf [file NIHMS223481-supplement-1_si_001.pdf]

# Structure and Relative Potency of Several Karlotoxins from *Karlodinium veneficum*— Supporting Information

Ryan M. Van Wagoner,<sup>a</sup> Jonathan R. Deeds,<sup>b</sup> Avery O Tatters,<sup>a</sup> Allen R. Place<sup>c</sup> Carmelo R. Tomas,<sup>a</sup> and  
Jeffrey L.C. Wright<sup>a,\*</sup>

<sup>a</sup>Center for Marine Science

University of North Carolina at Wilmington

5600 Marvin K Moss Lane, Wilmington, NC 28409, USA

<sup>b</sup>Center for Food Safety and Applied Nutrition

U.S. Food and Drug Administration, College Park, MD 20740, USA

<sup>c</sup>Institute for Marine and Environmental Technology

University of Maryland Center of Environmental Sciences

701 East Pratt Street, Suite 236, Baltimore, MD 21202, USA

---

\*To whom correspondence should be addressed. Tel: 910-962-2397, E-mail: wrightj@uncw.edu

## NMR spectra of KmTx 3 (3)

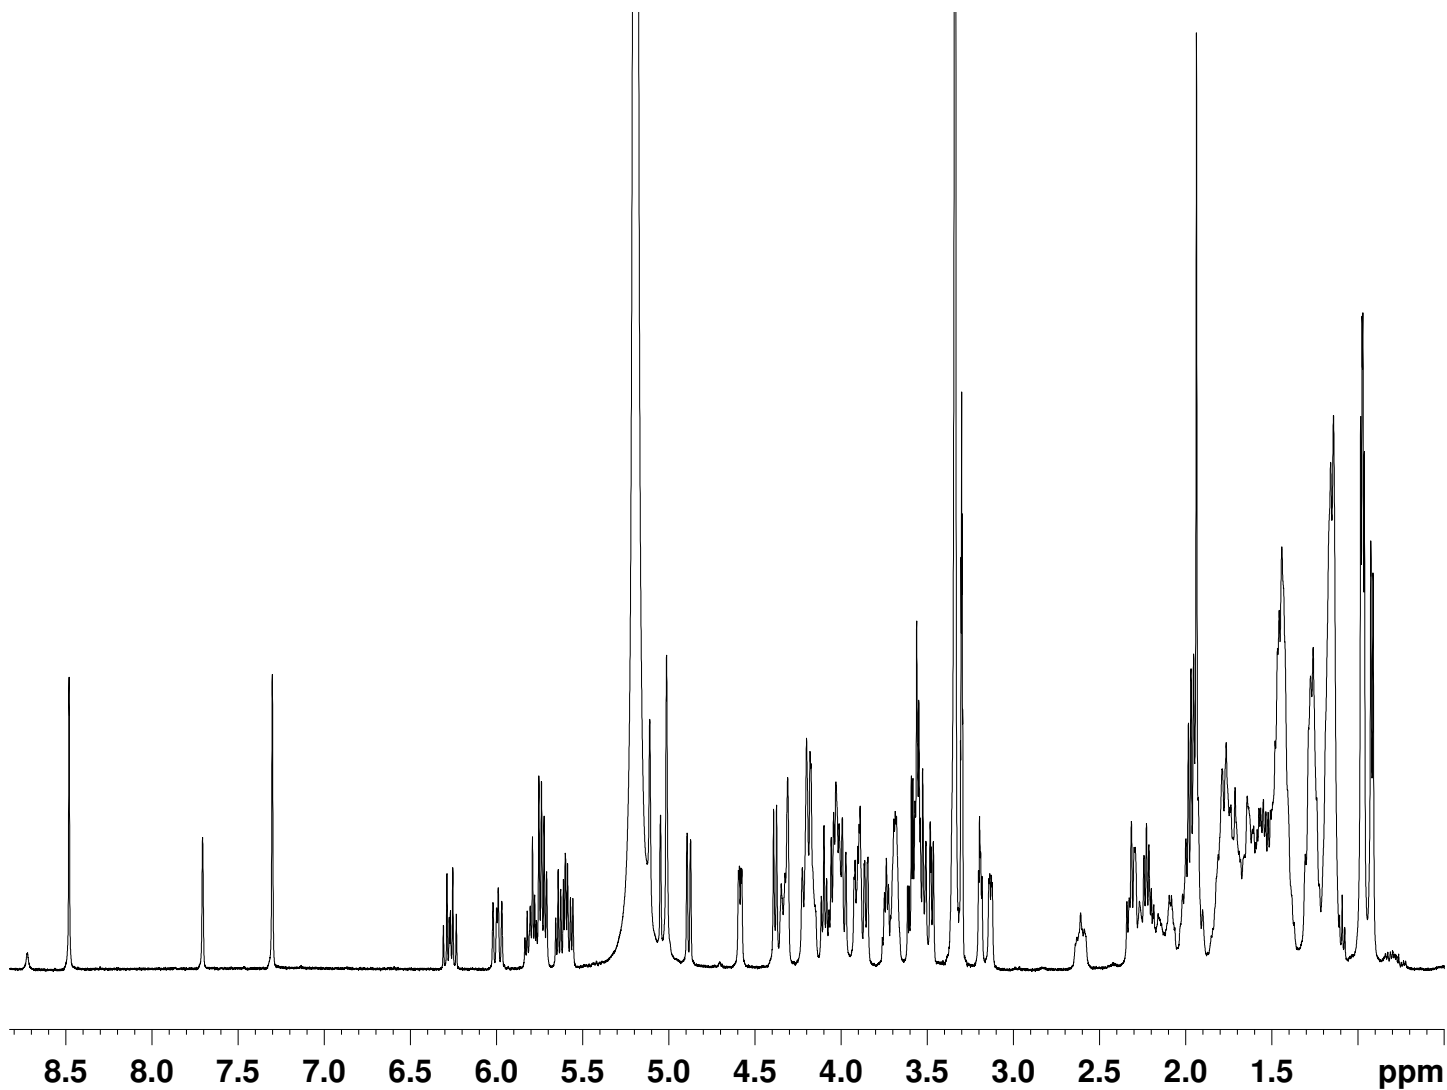

Figure S1.  $^1\text{H}$  NMR spectrum of KmTx 3 (3).

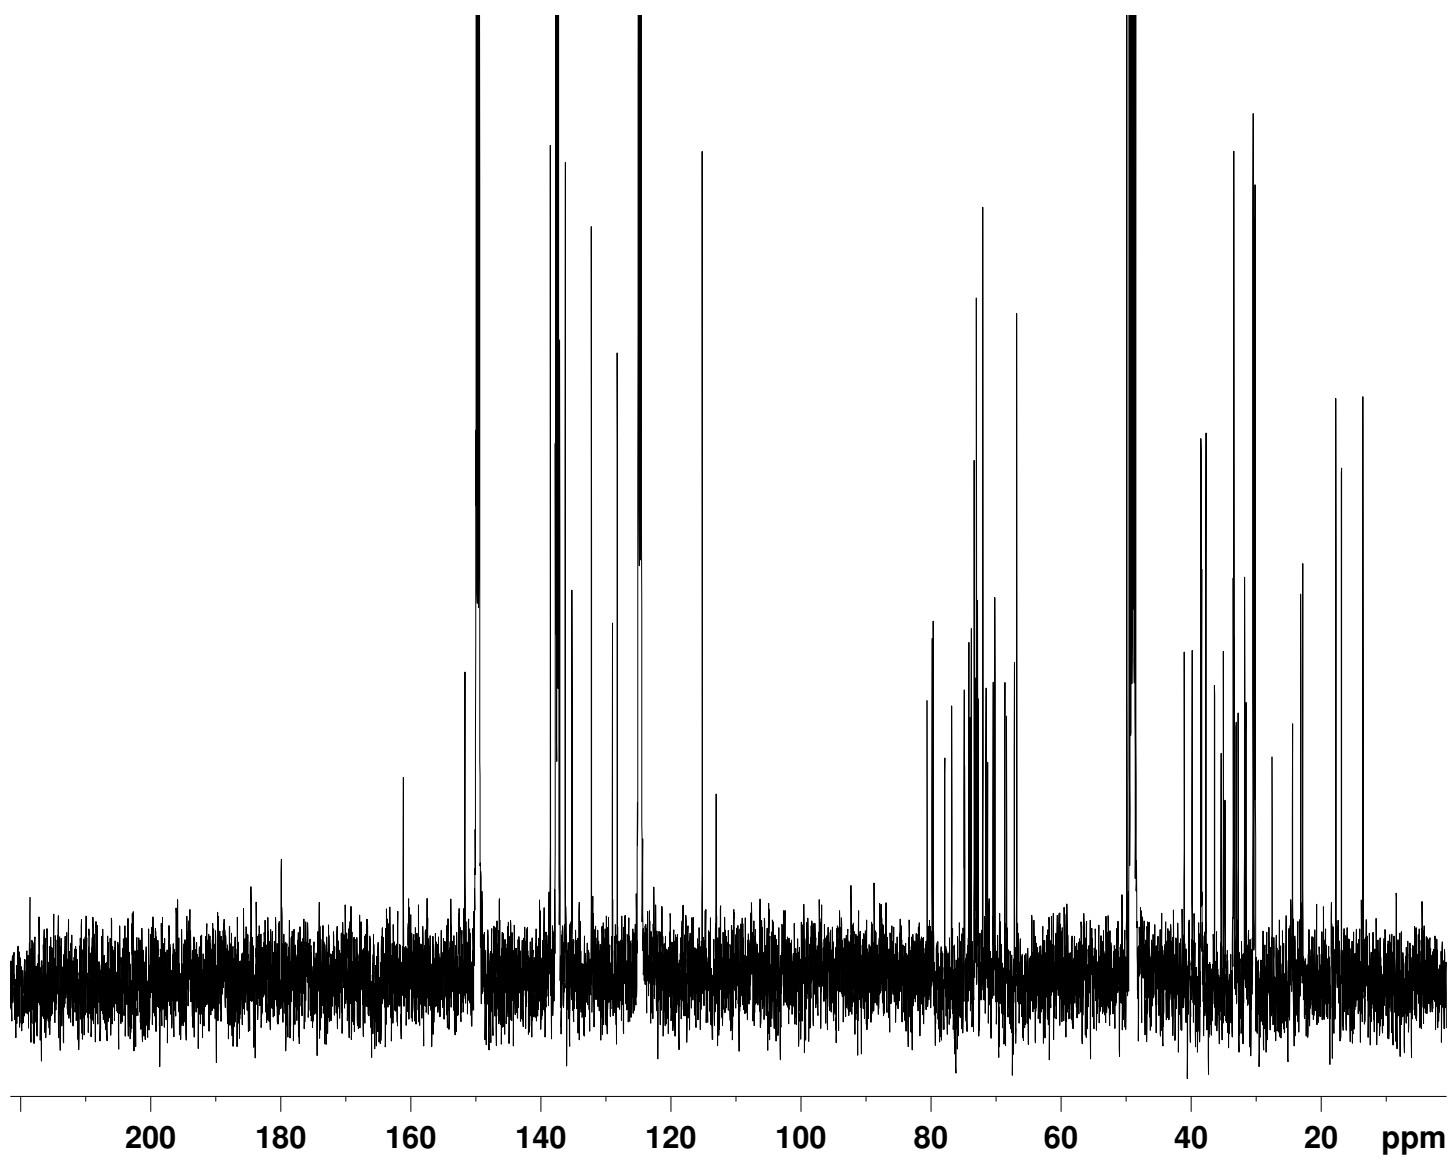

Figure S2.  $^{13}\text{C}$  NMR spectrum of KmTx 3 (3).

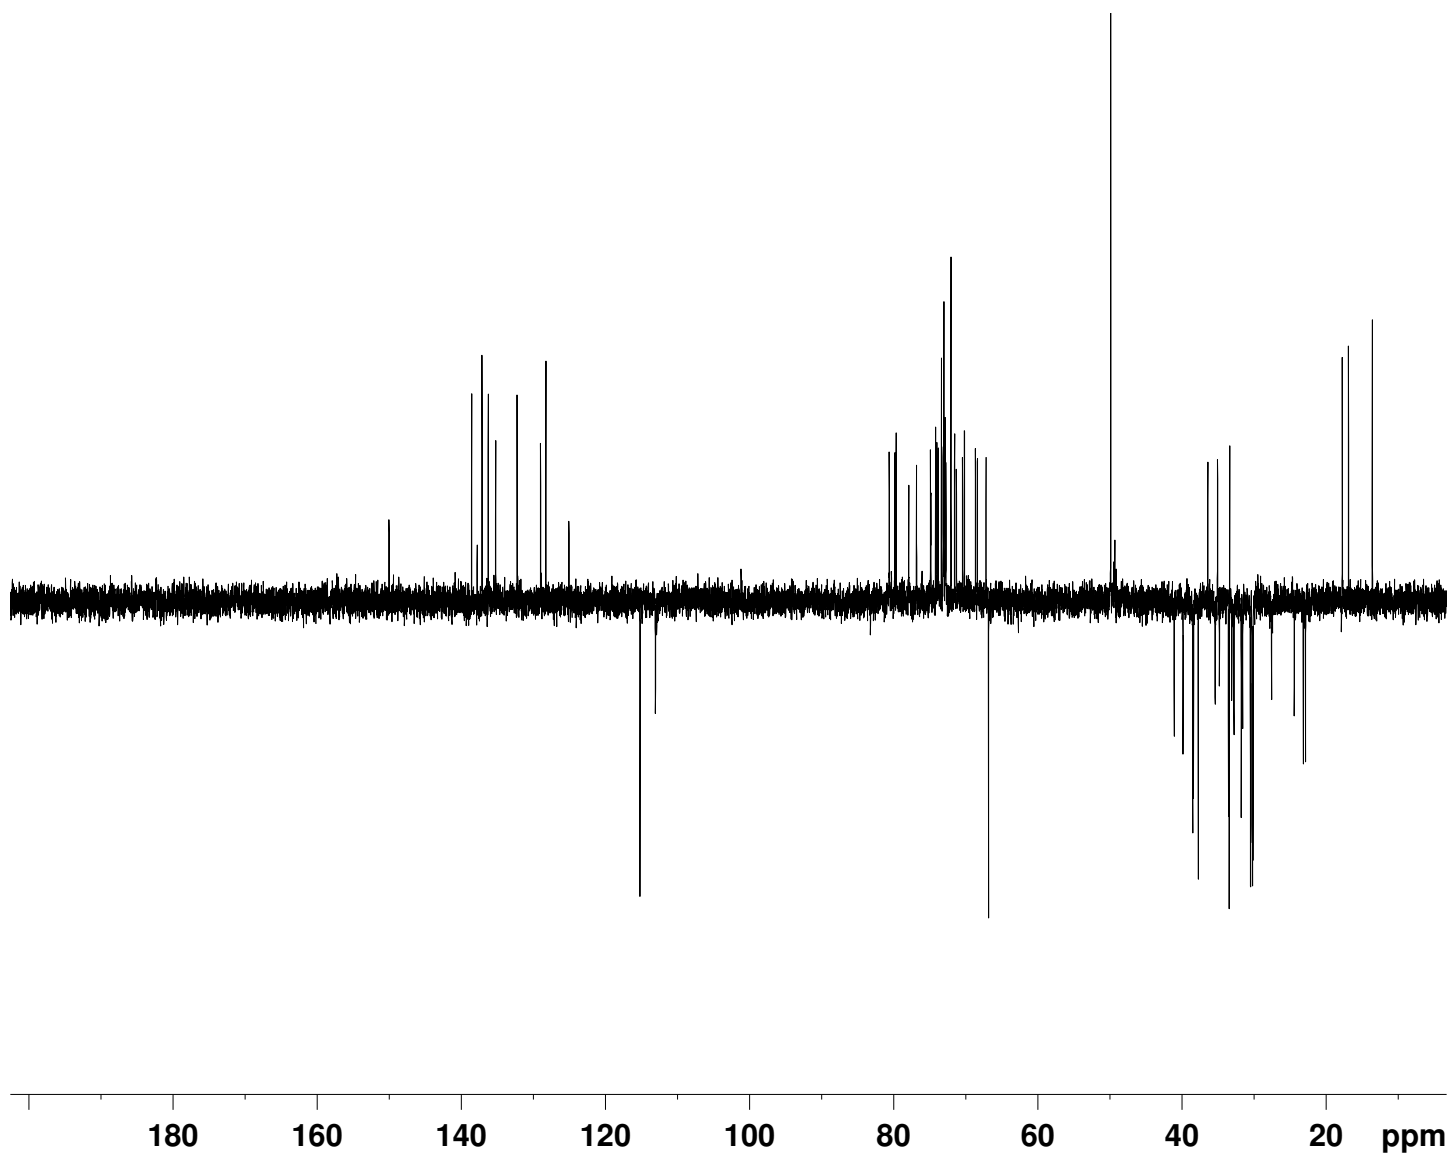

Figure S3. DEPT spectrum of KmTx 3 (3).

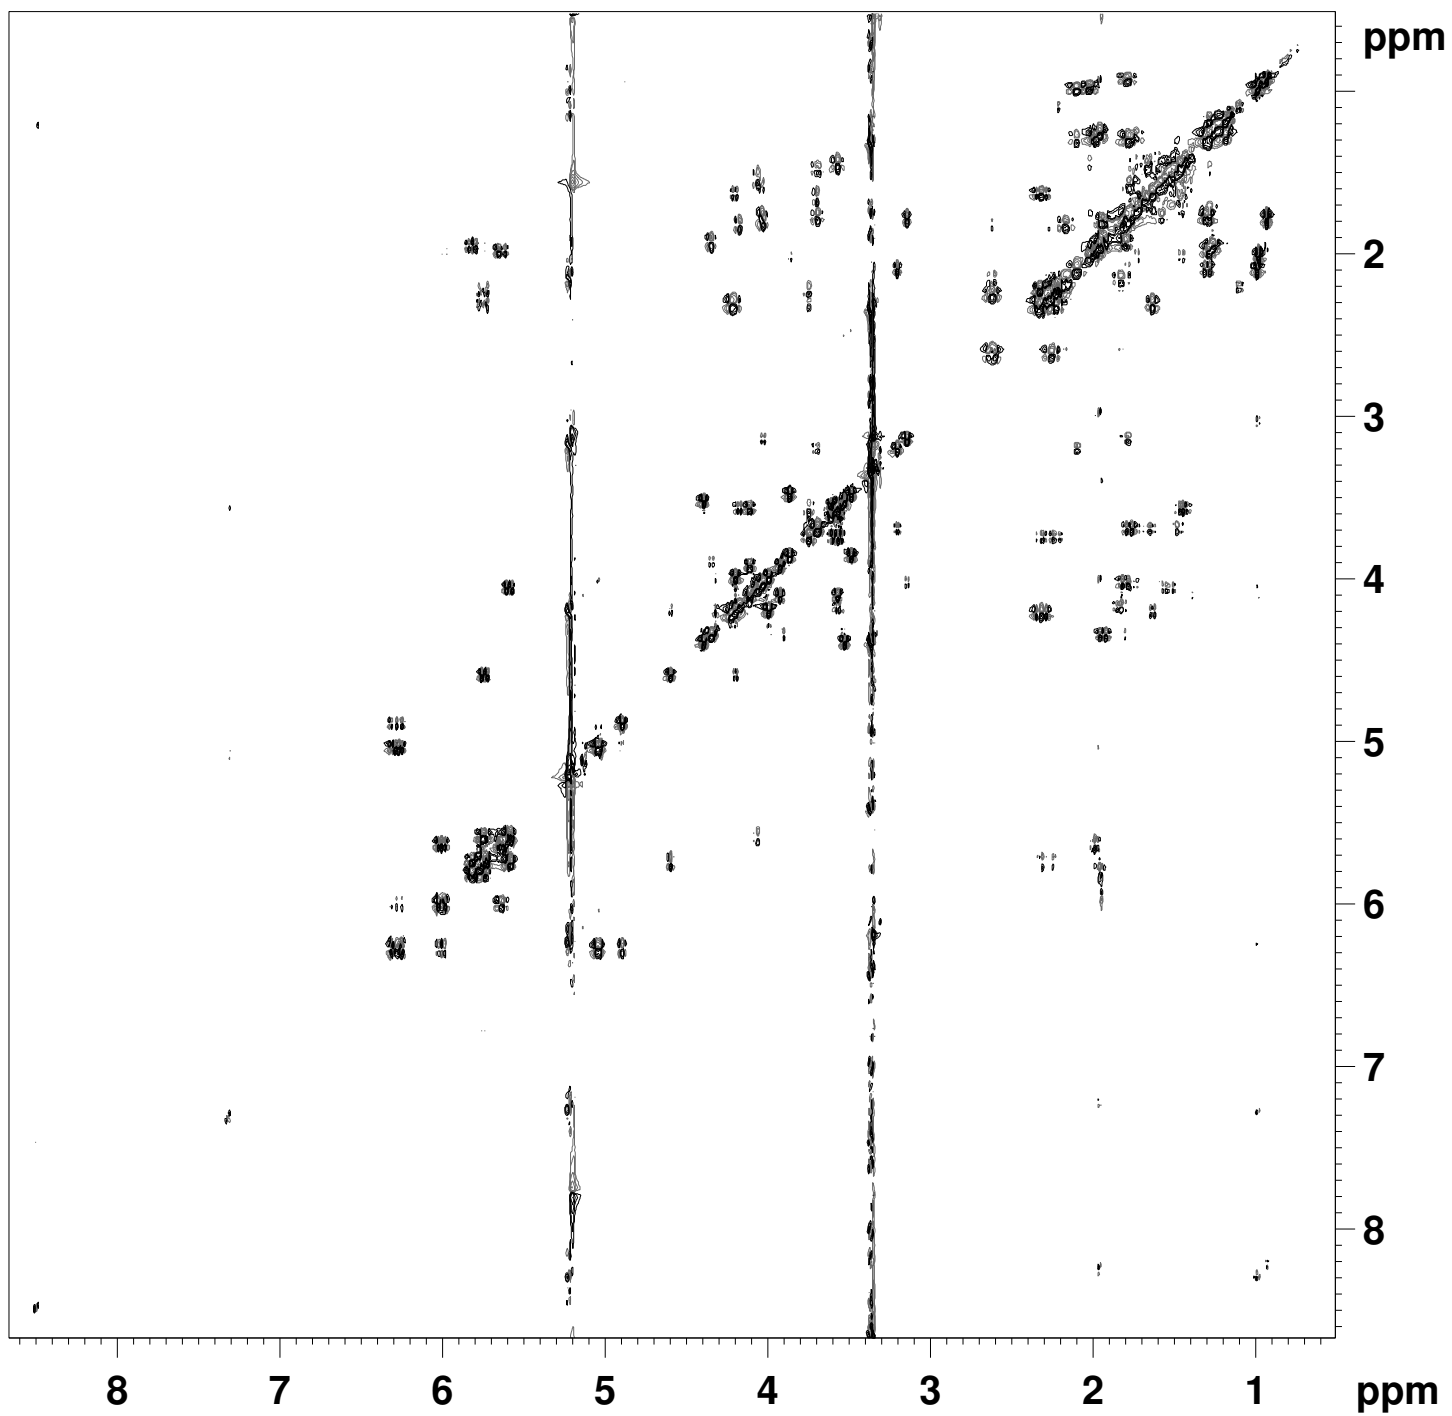

Figure S4. COSY spectrum of KmTx 3 (3).

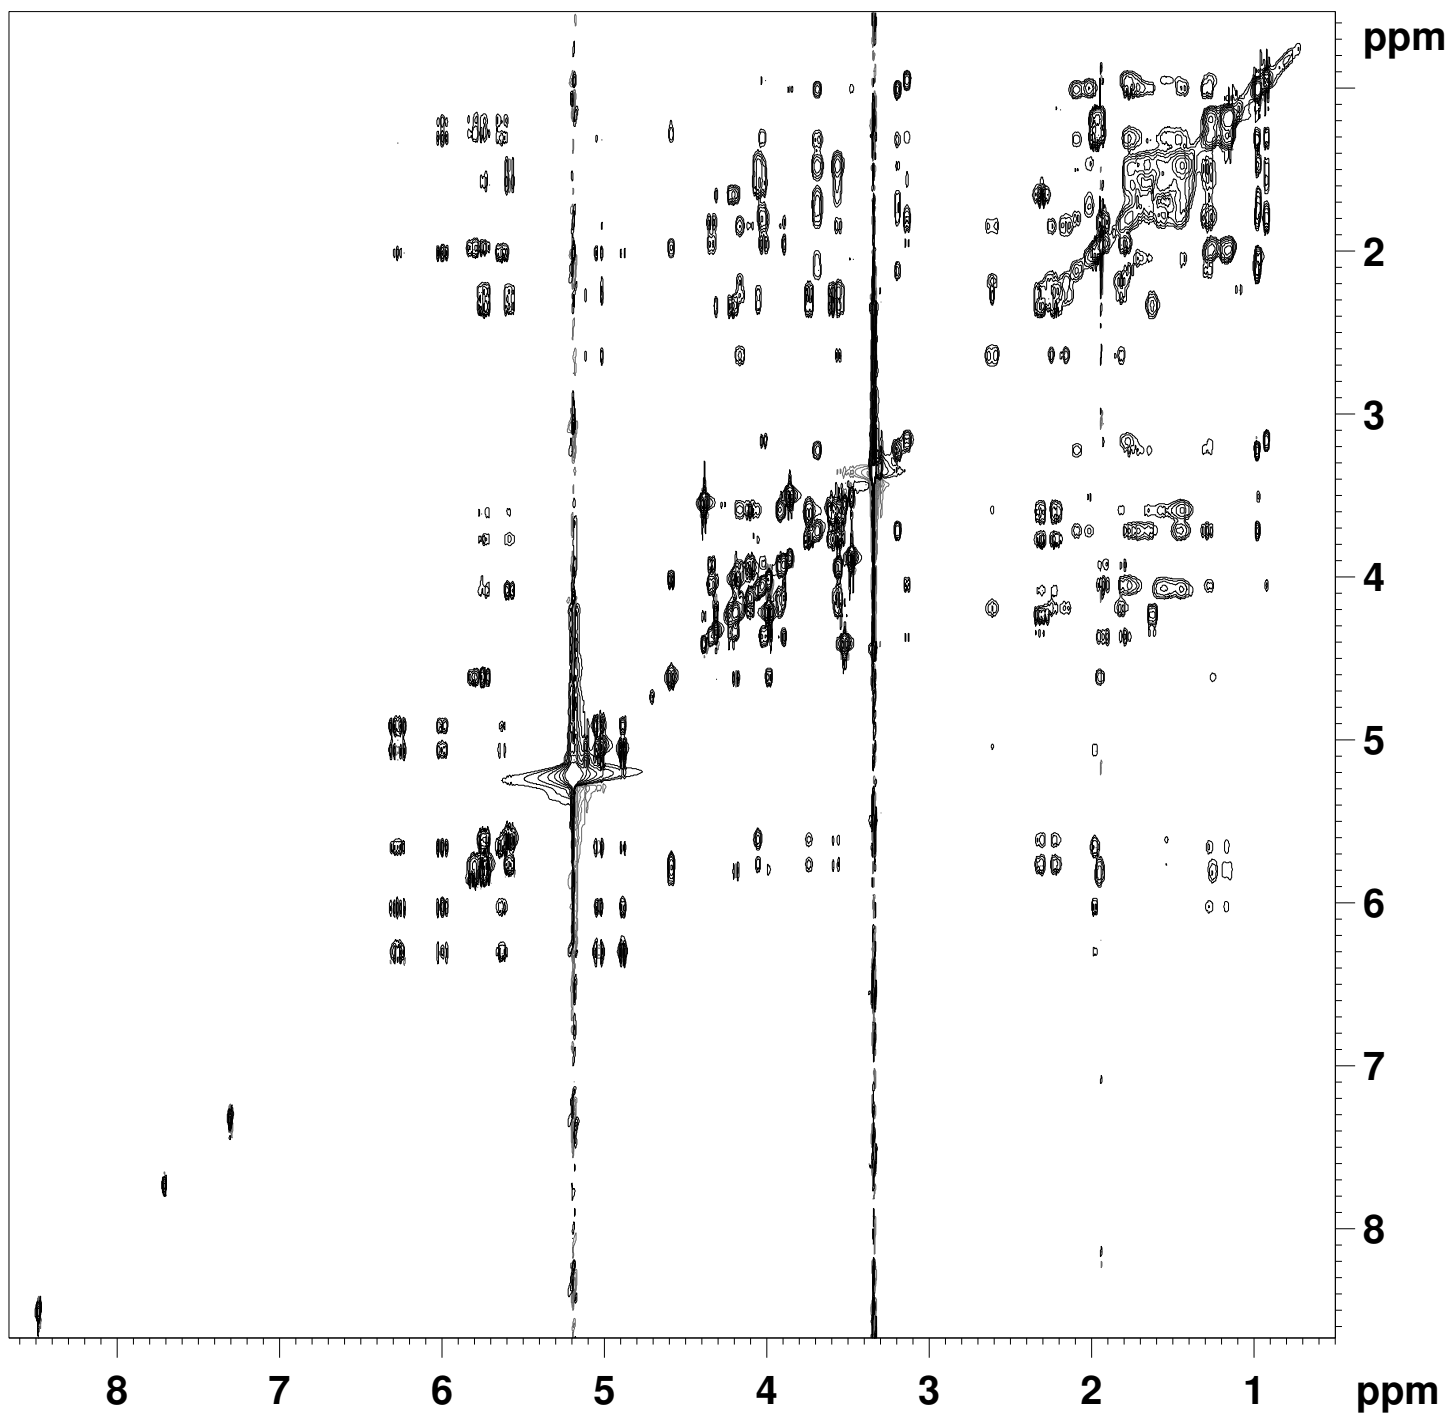

Figure S5. TOCSY spectrum of KmTx 3 (3).

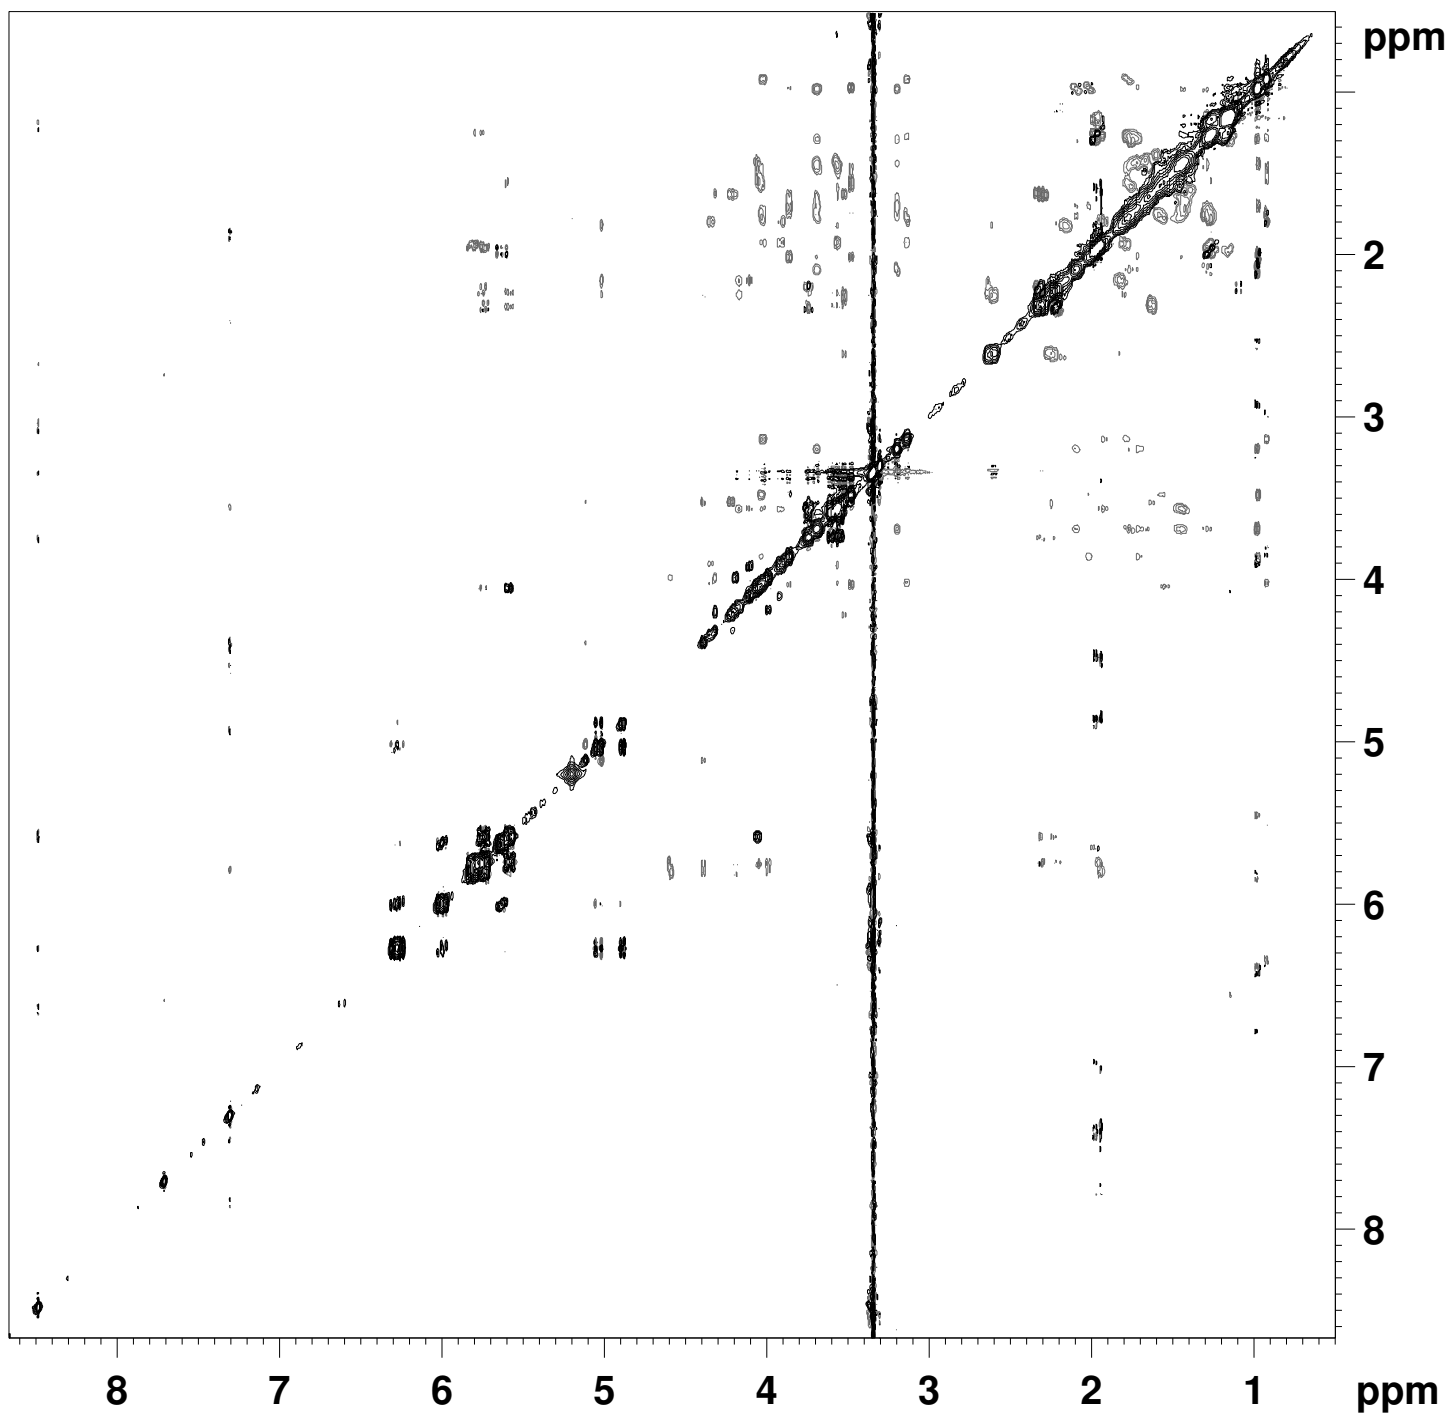

Figure S6. ROESY spectrum of KmTx 3 (3).

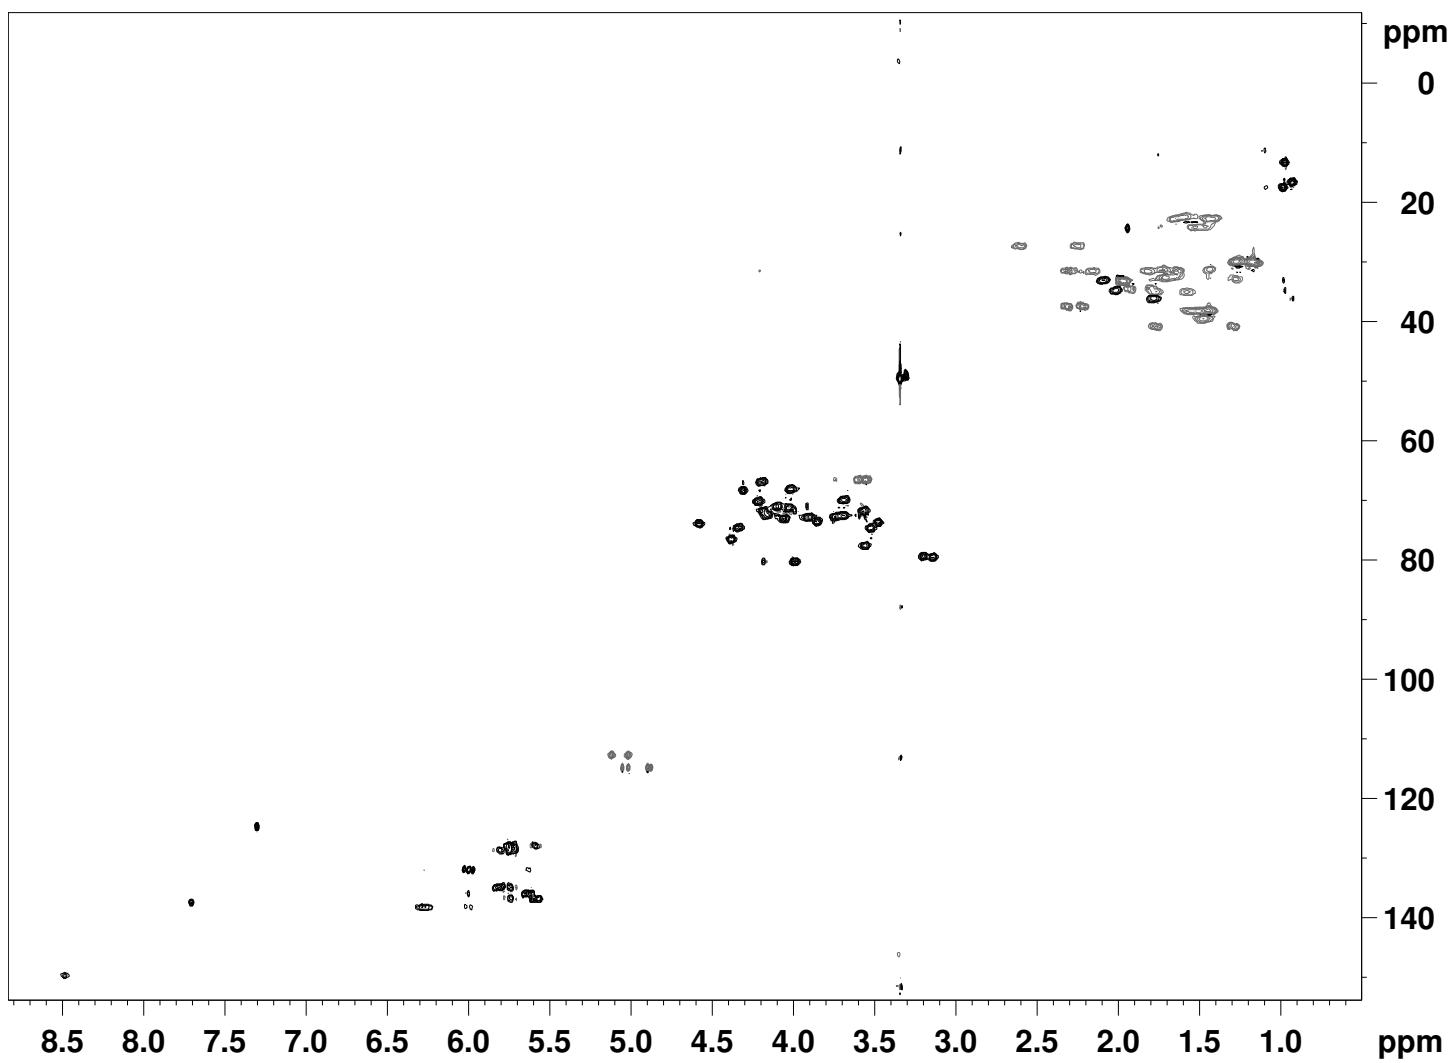

Figure S7. HSQC spectrum of KmTx 3 (3).



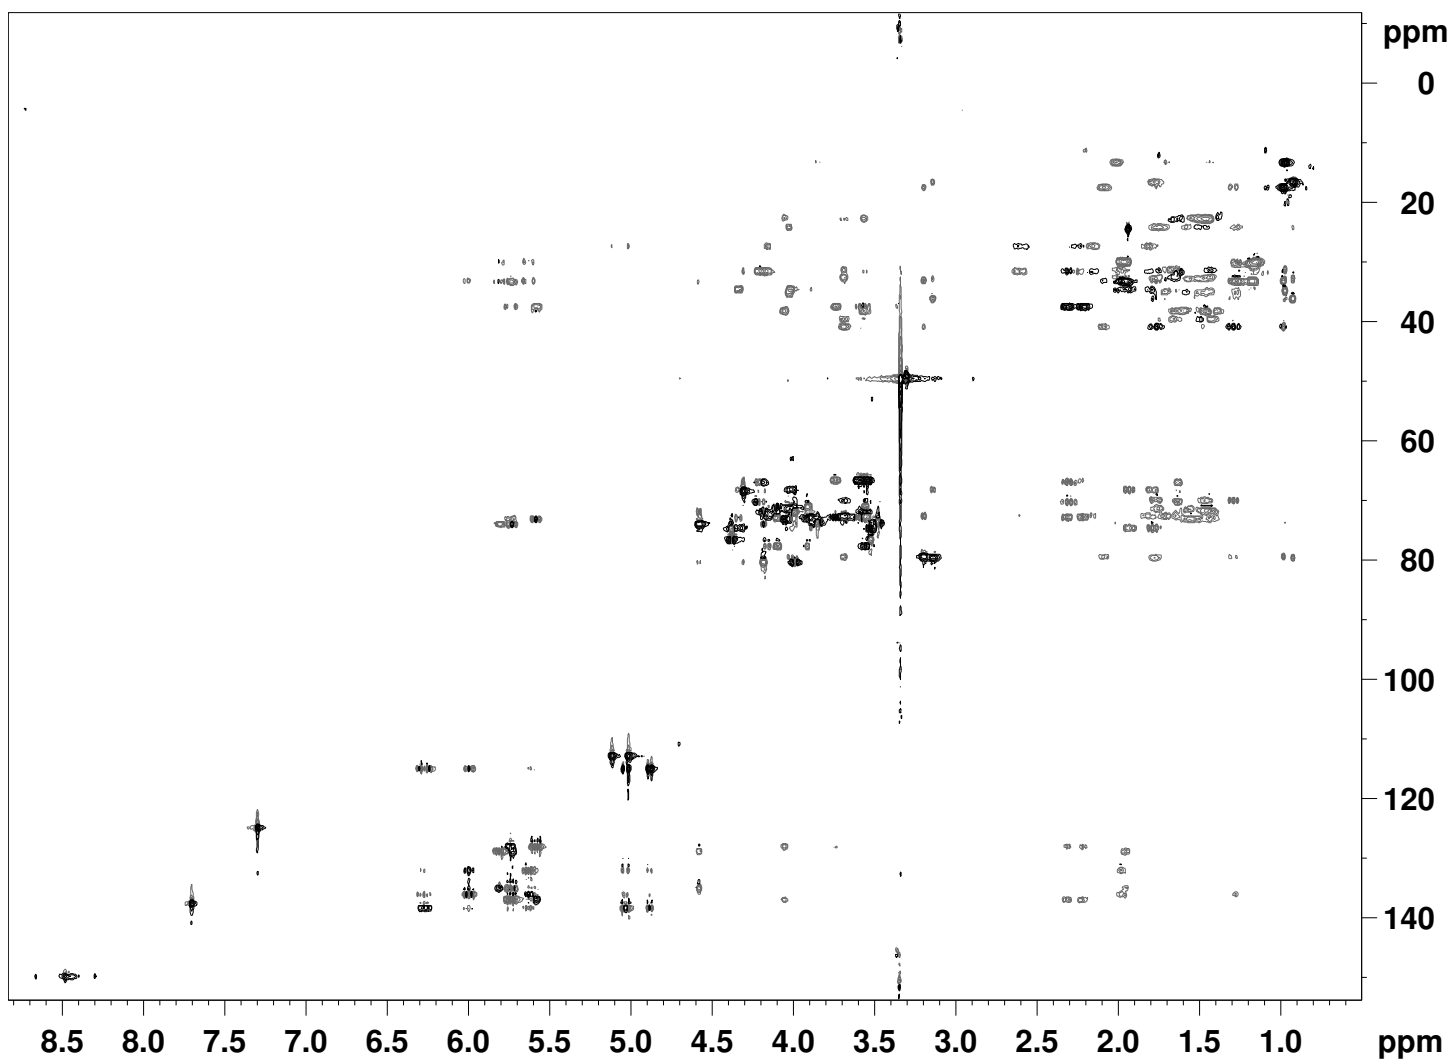

Figure S8. HSQC-TOCSY spectrum of KmTx 3 (3).

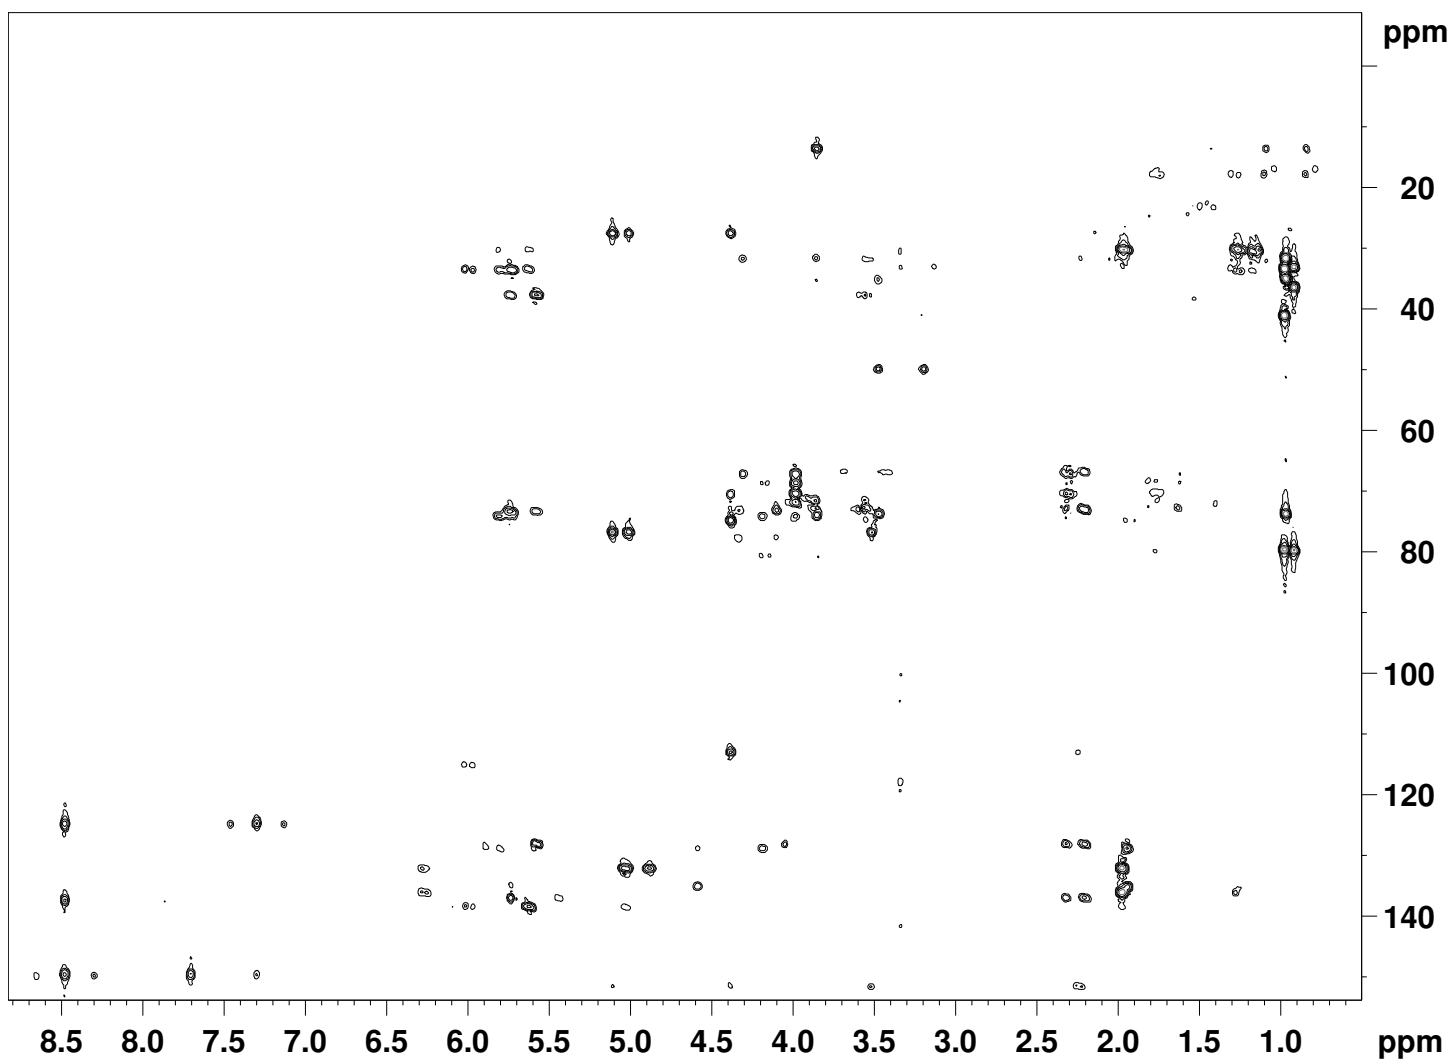

Figure S9. HMBC spectrum of KmTx 3 (3).

## NMR spectra of 64-*E*-chloro-KmTx 3 (4)

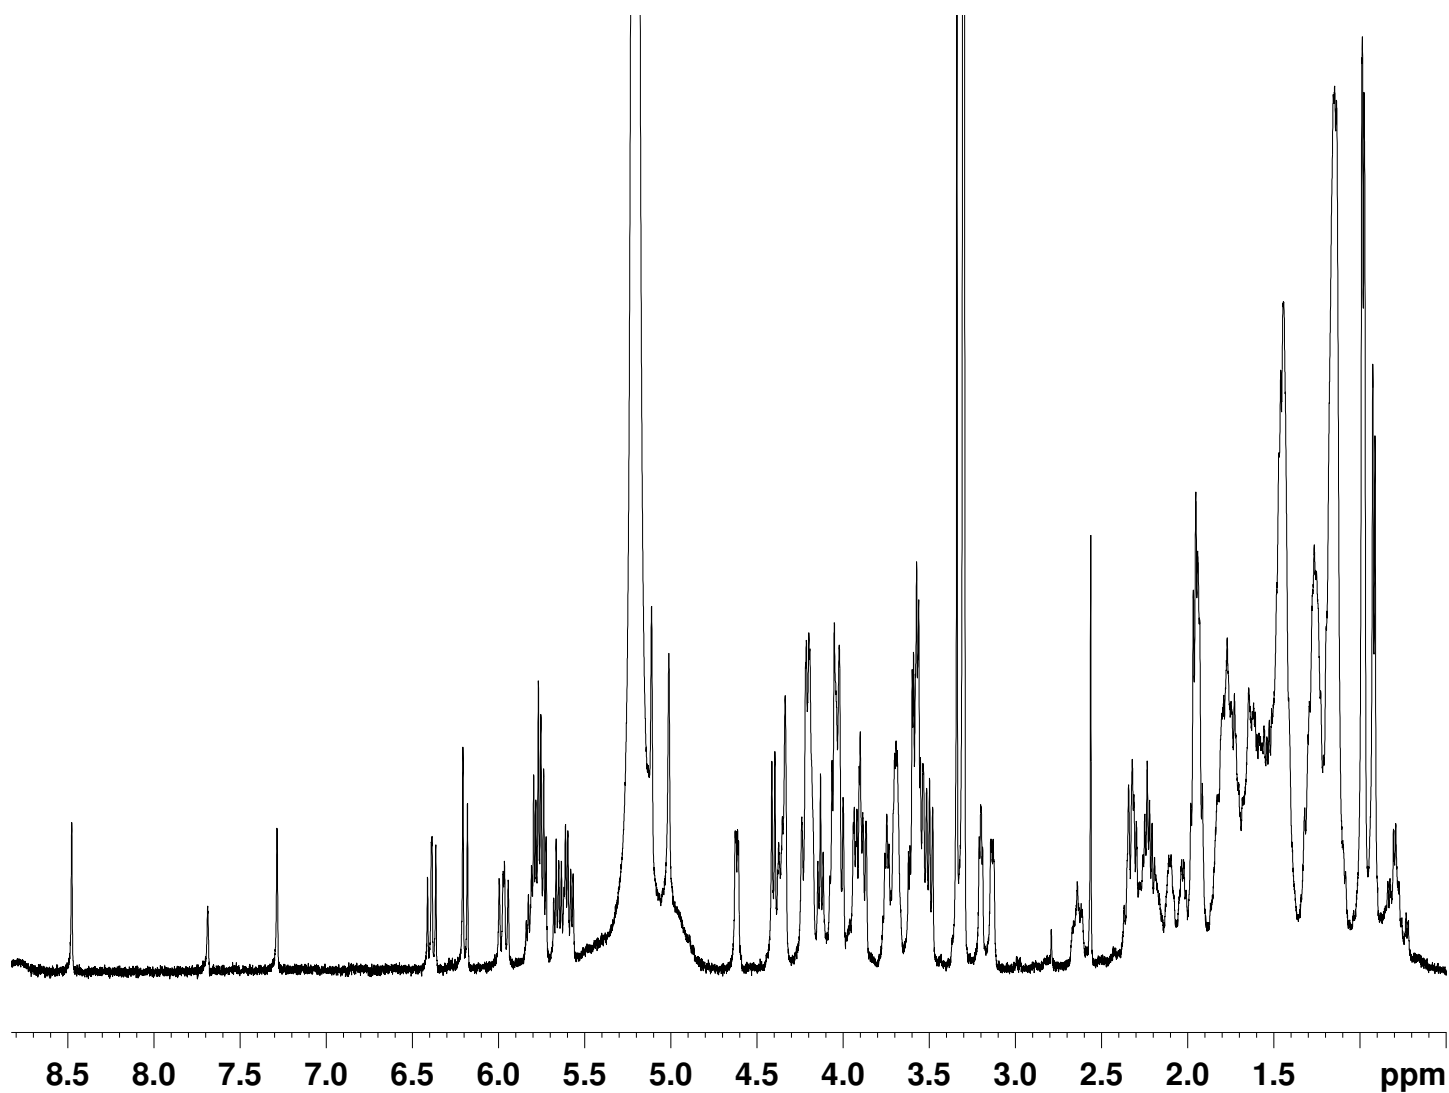

Figure S10. <sup>1</sup>H NMR spectrum of 64-*E*-chloro-KmTx 3 (4).

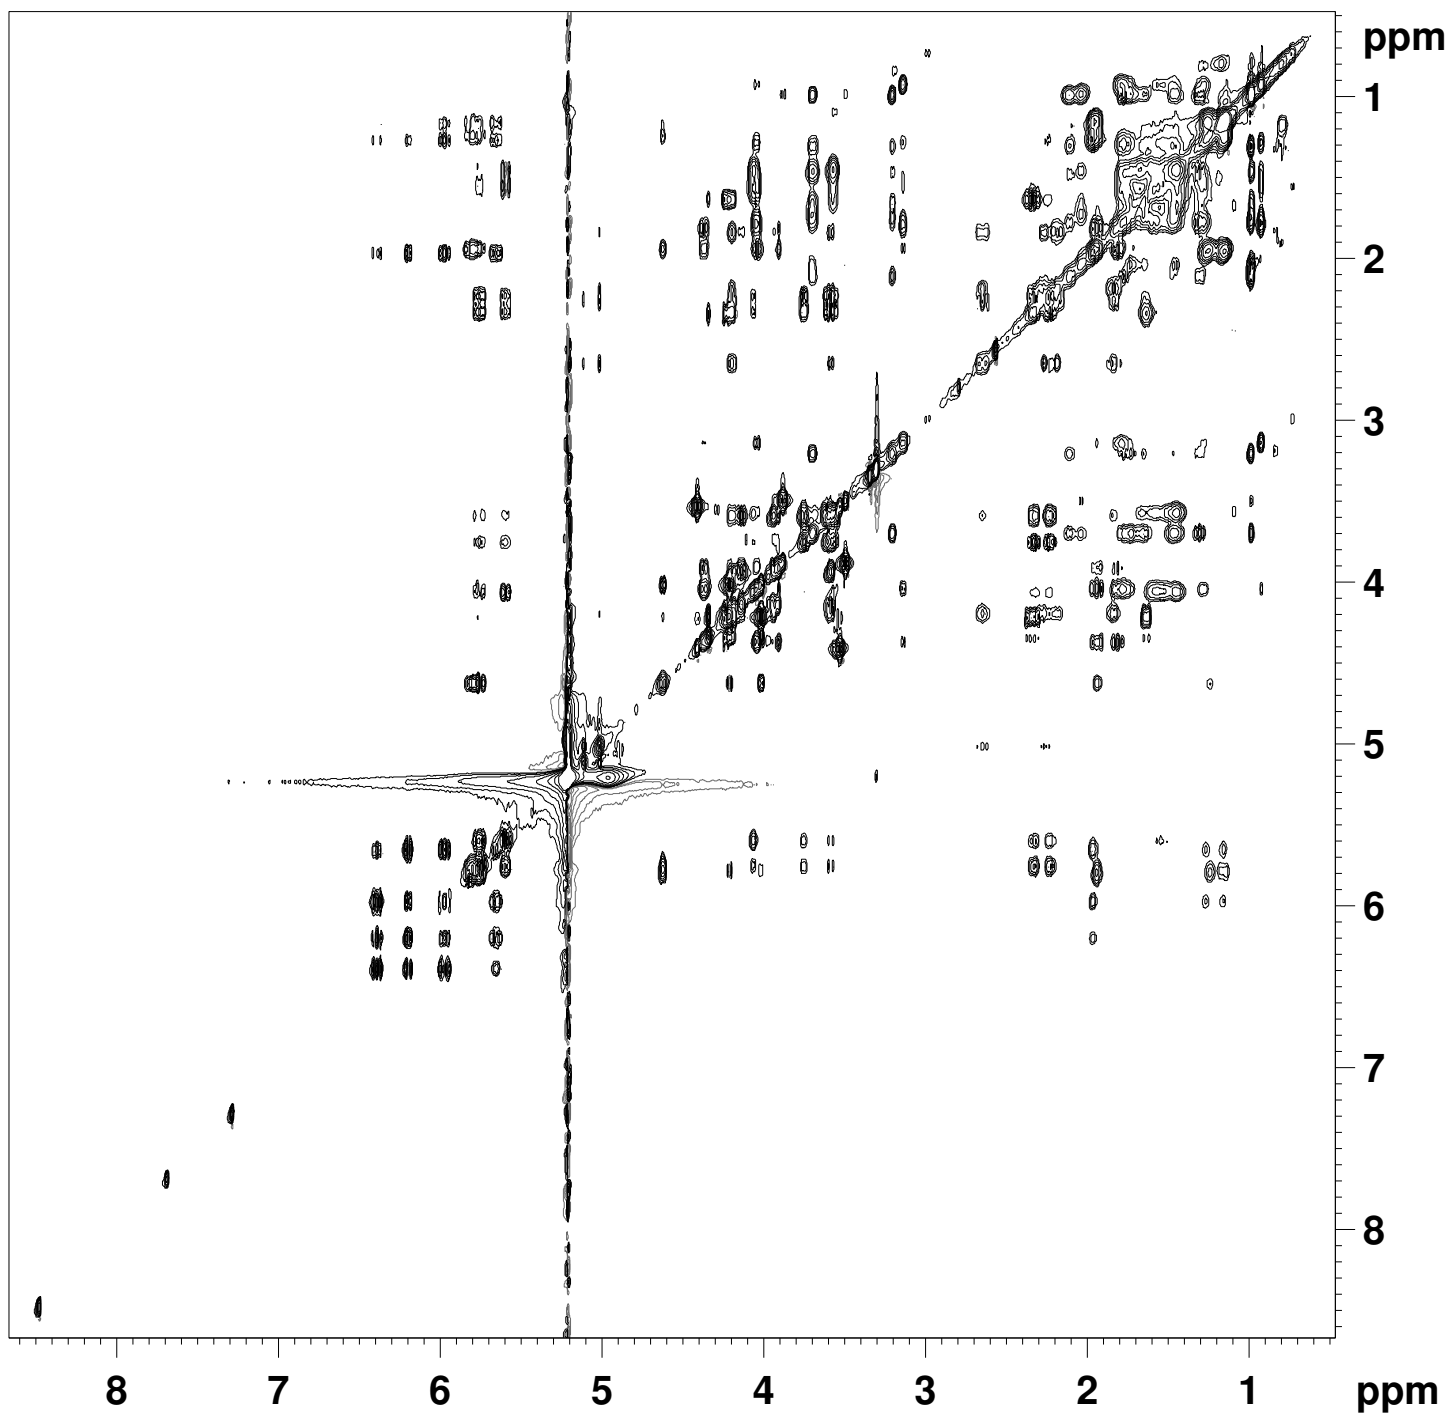

Figure S11. TOCSY spectrum of 64-*E*-chloro-KmTx 3 (4).

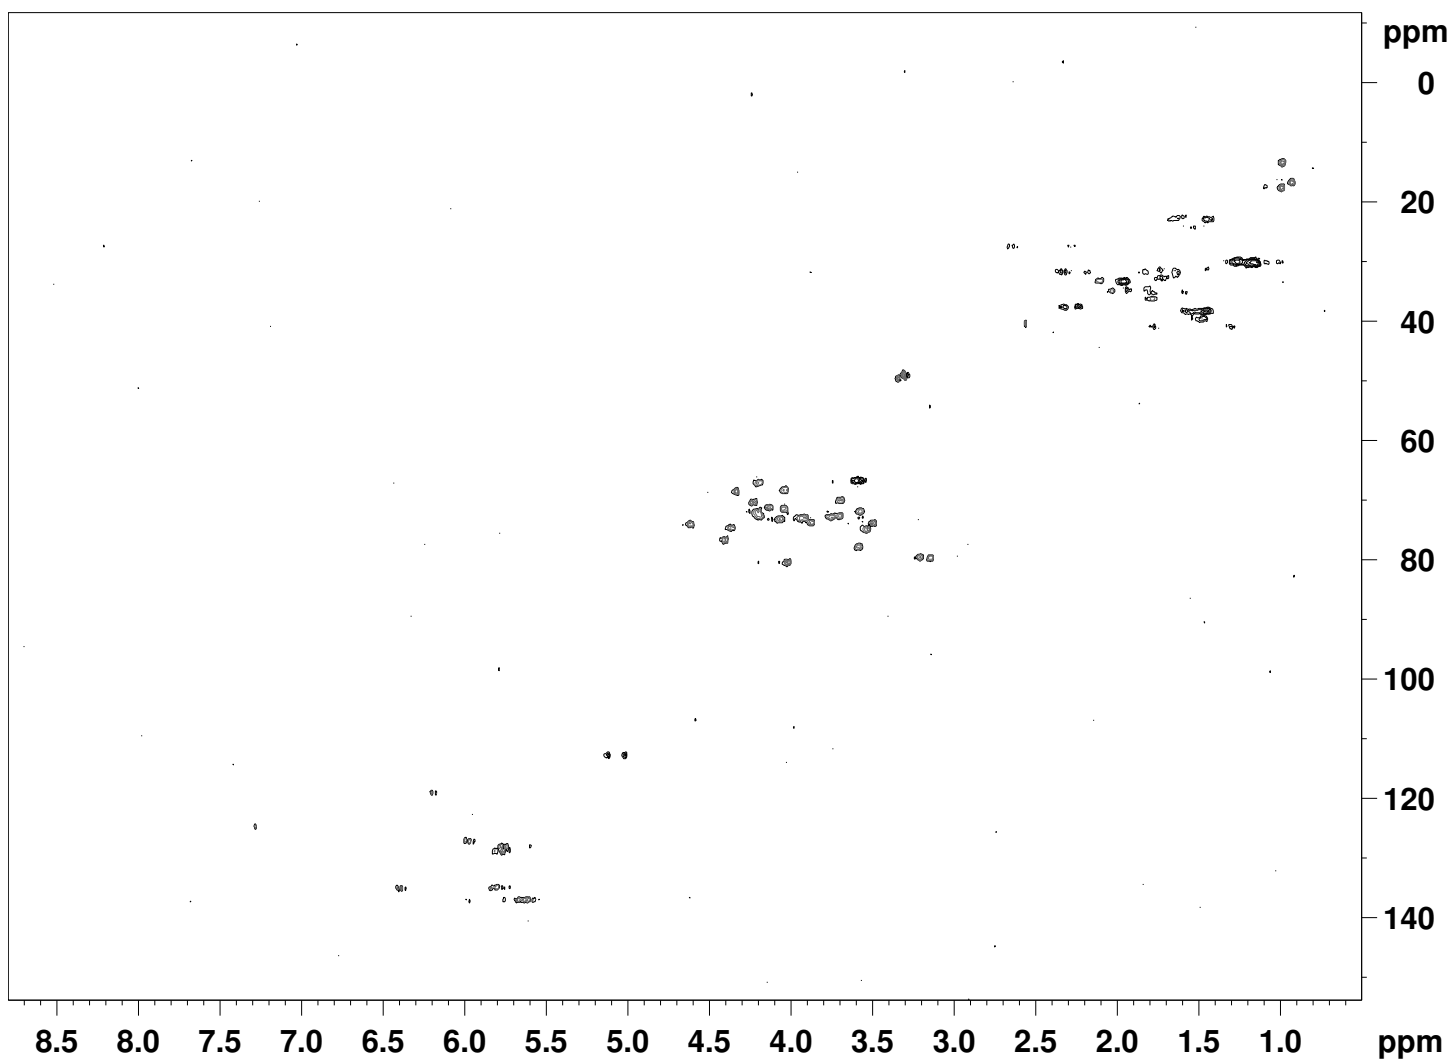

Figure S12. HSQC spectrum of 64-*E*-chloro-KmTx 3 (**4**).

## NMR spectra of 10-*O*-sulfo-KmTx 3 (5)

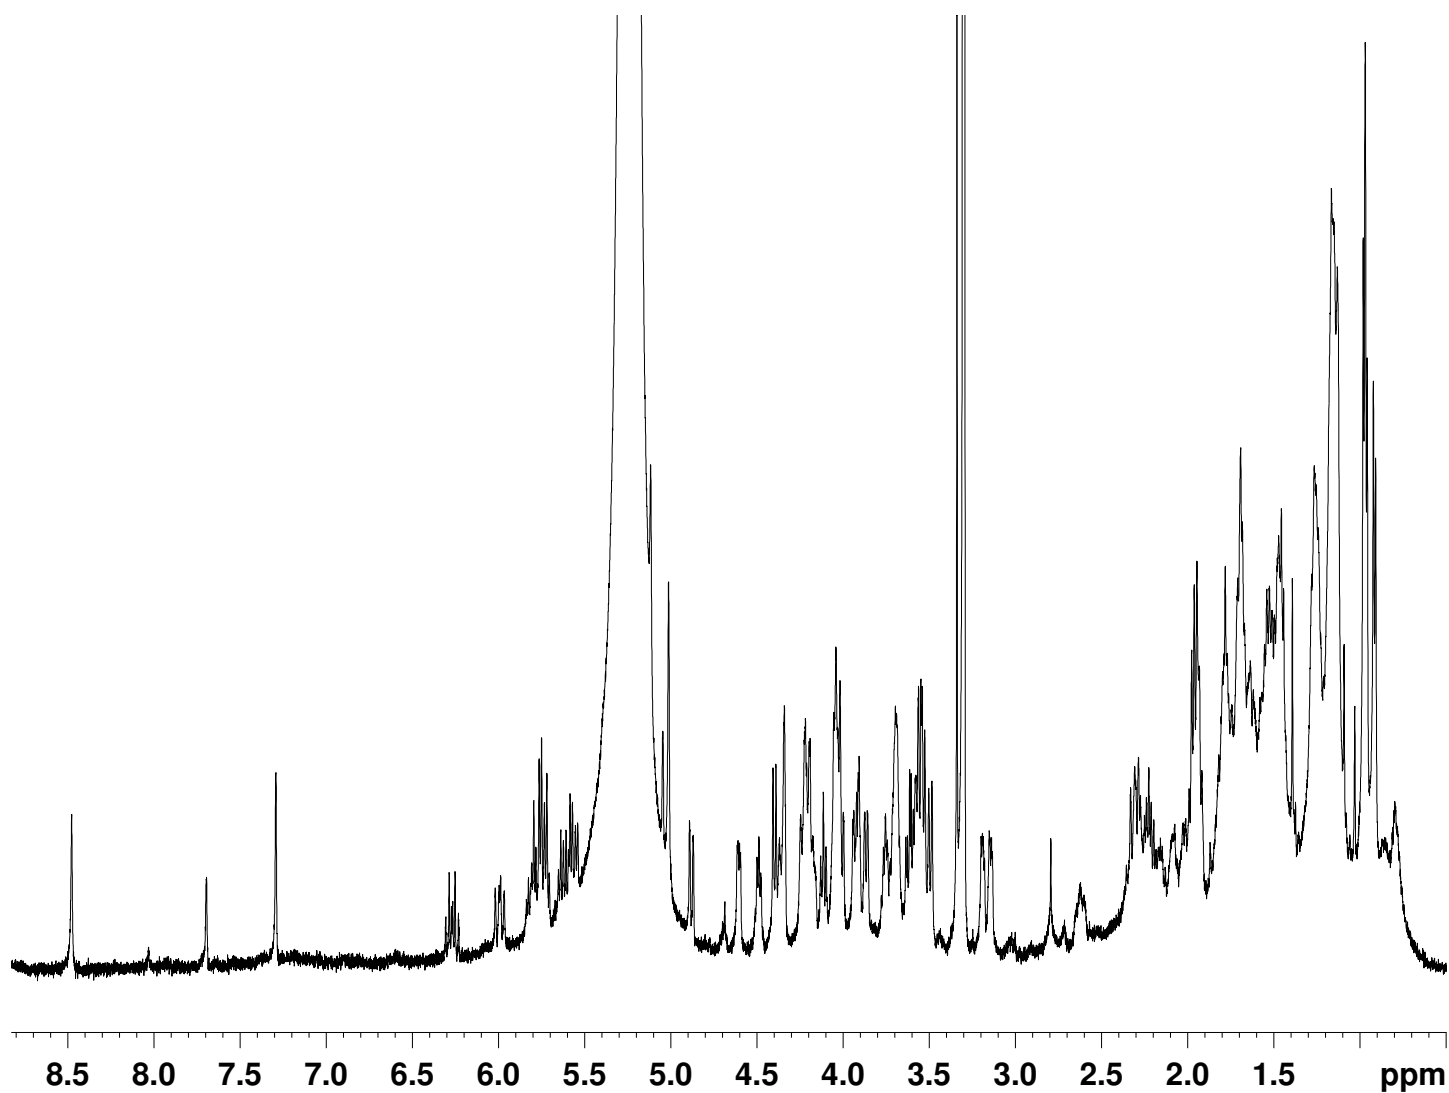

Figure S13. <sup>1</sup>H NMR spectrum of 10-*O*-sulfo-KmTx 3 (5).

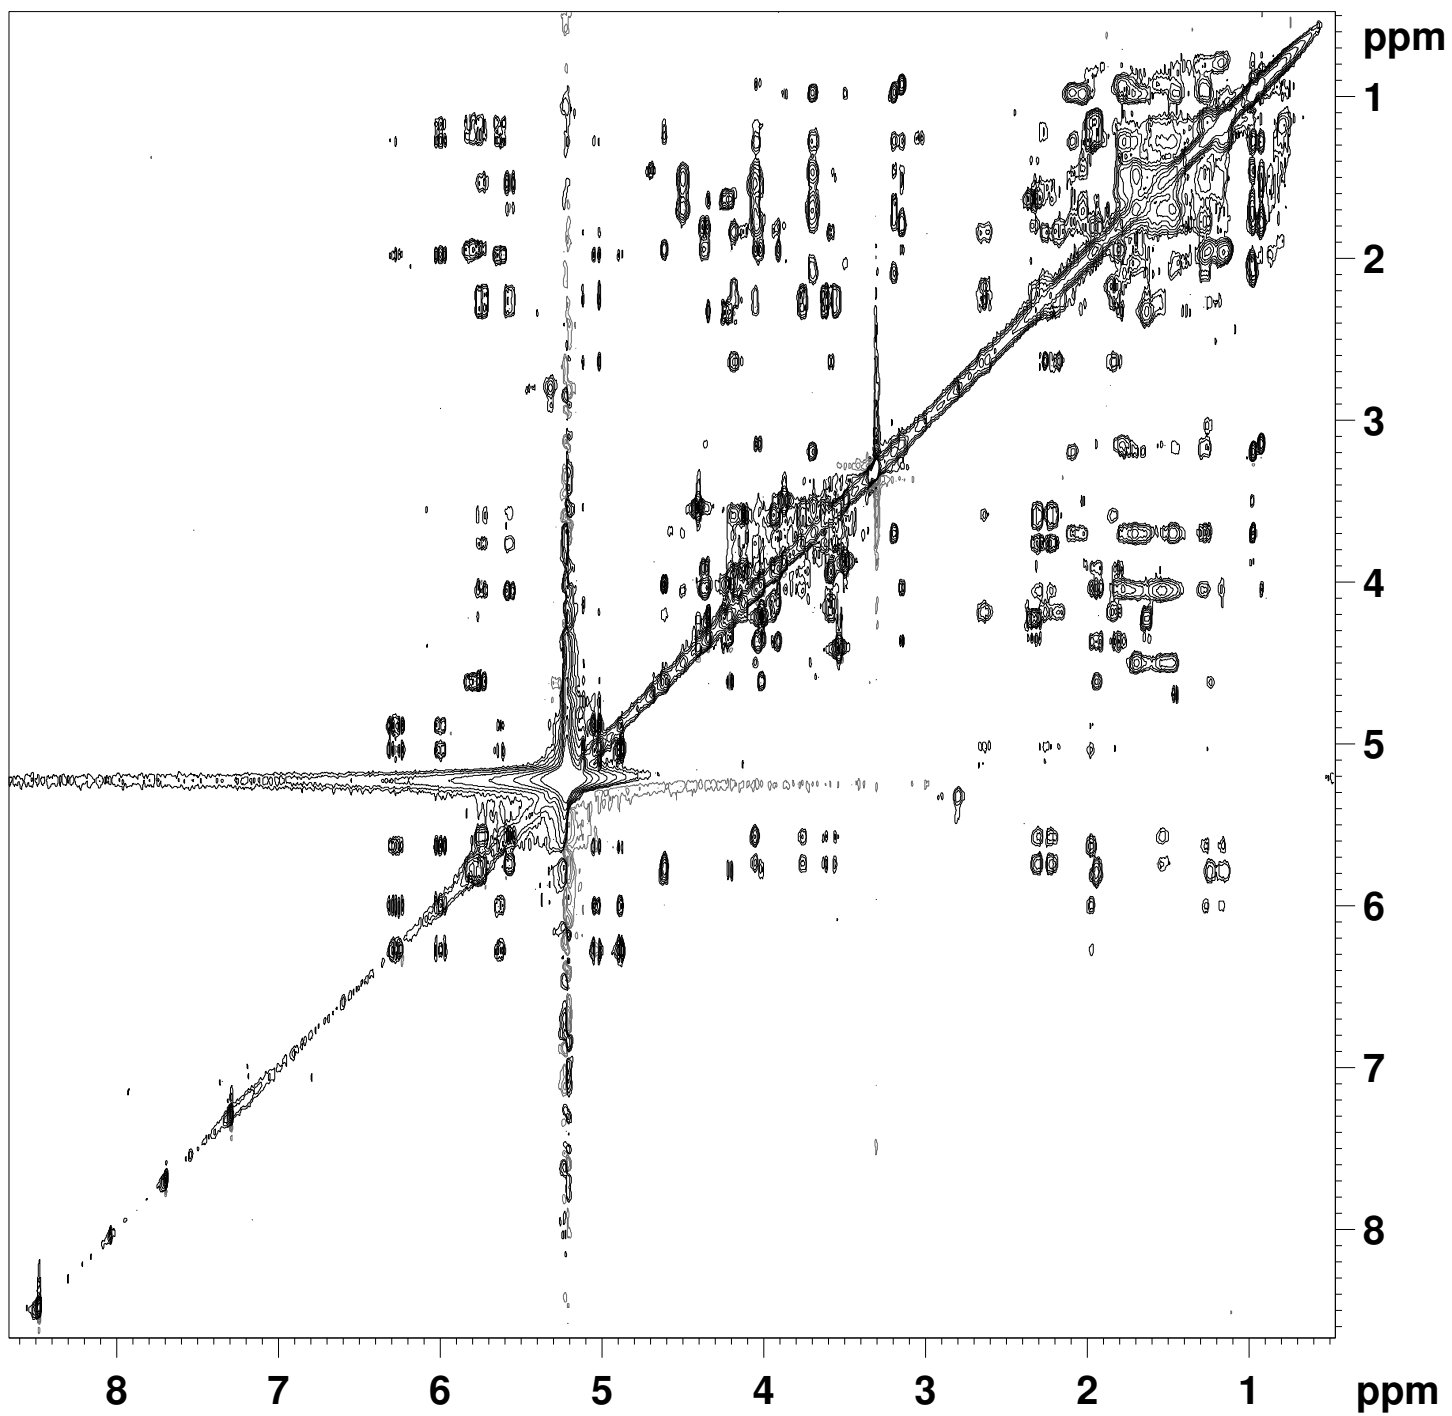

Figure S14. TOCSY spectrum of 10-*O*-sulfo-KmTx 3 (5).



Figure S15. HSQC spectrum of 10-*O*-sulfo-KmTx 3 (5).



## NMR spectra of 65-*E*-chloro-KmTx 1 (6)

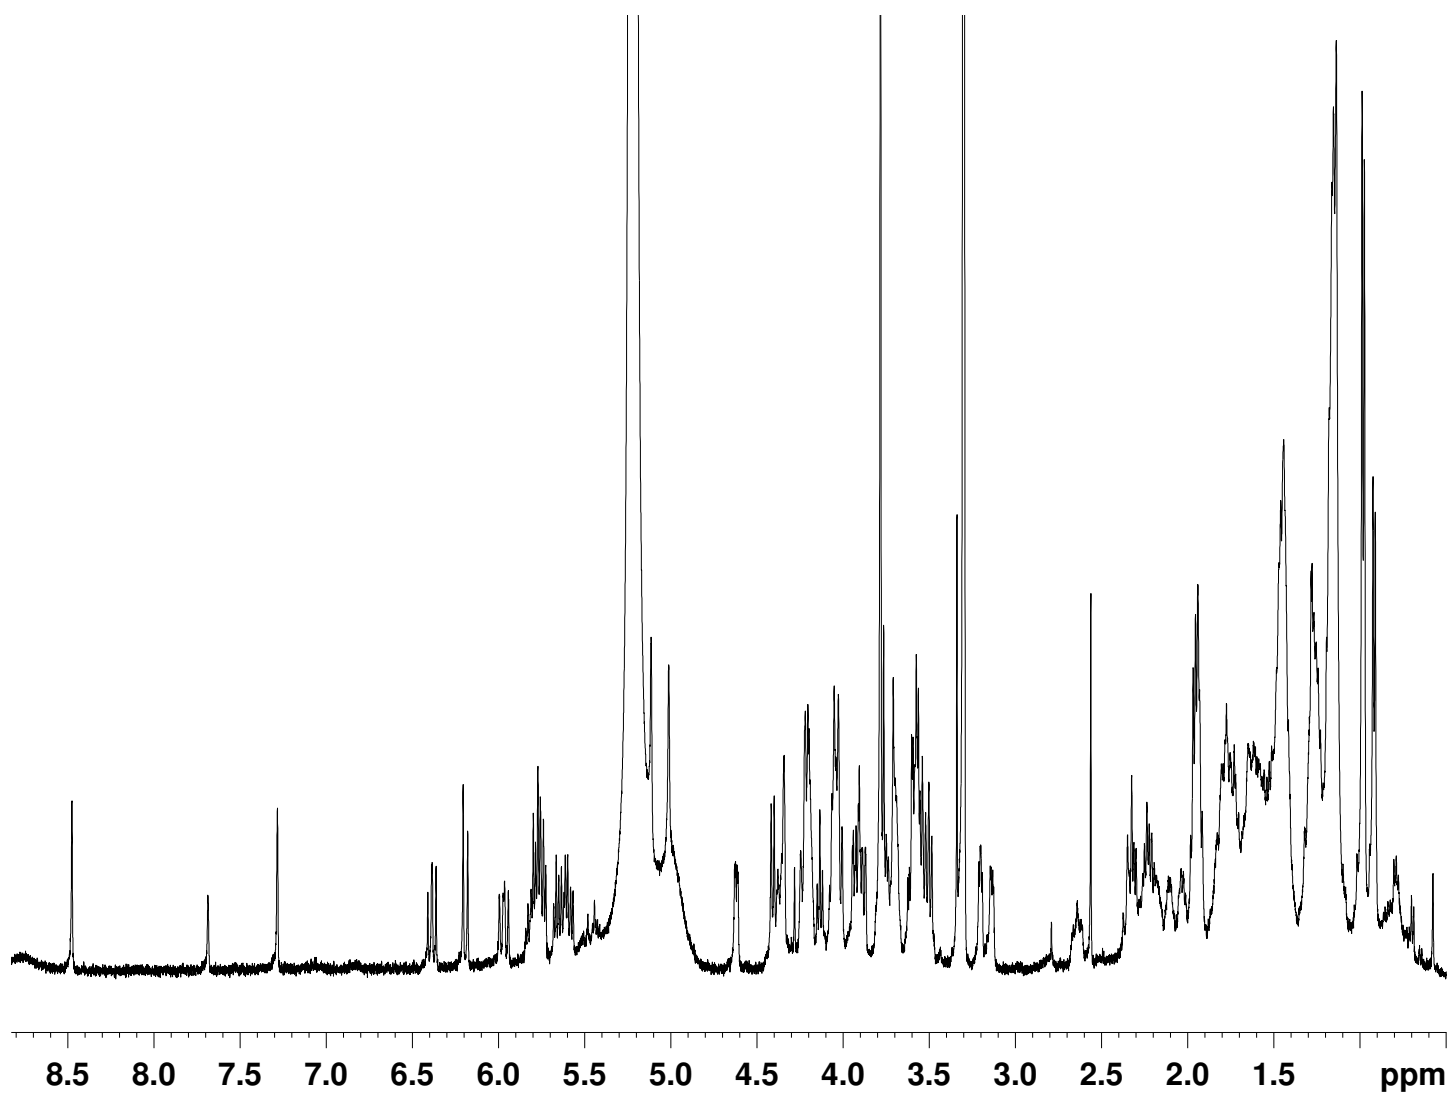

Figure S16. <sup>1</sup>H NMR spectrum of 65-*E*-chloro-KmTx 1 (6).

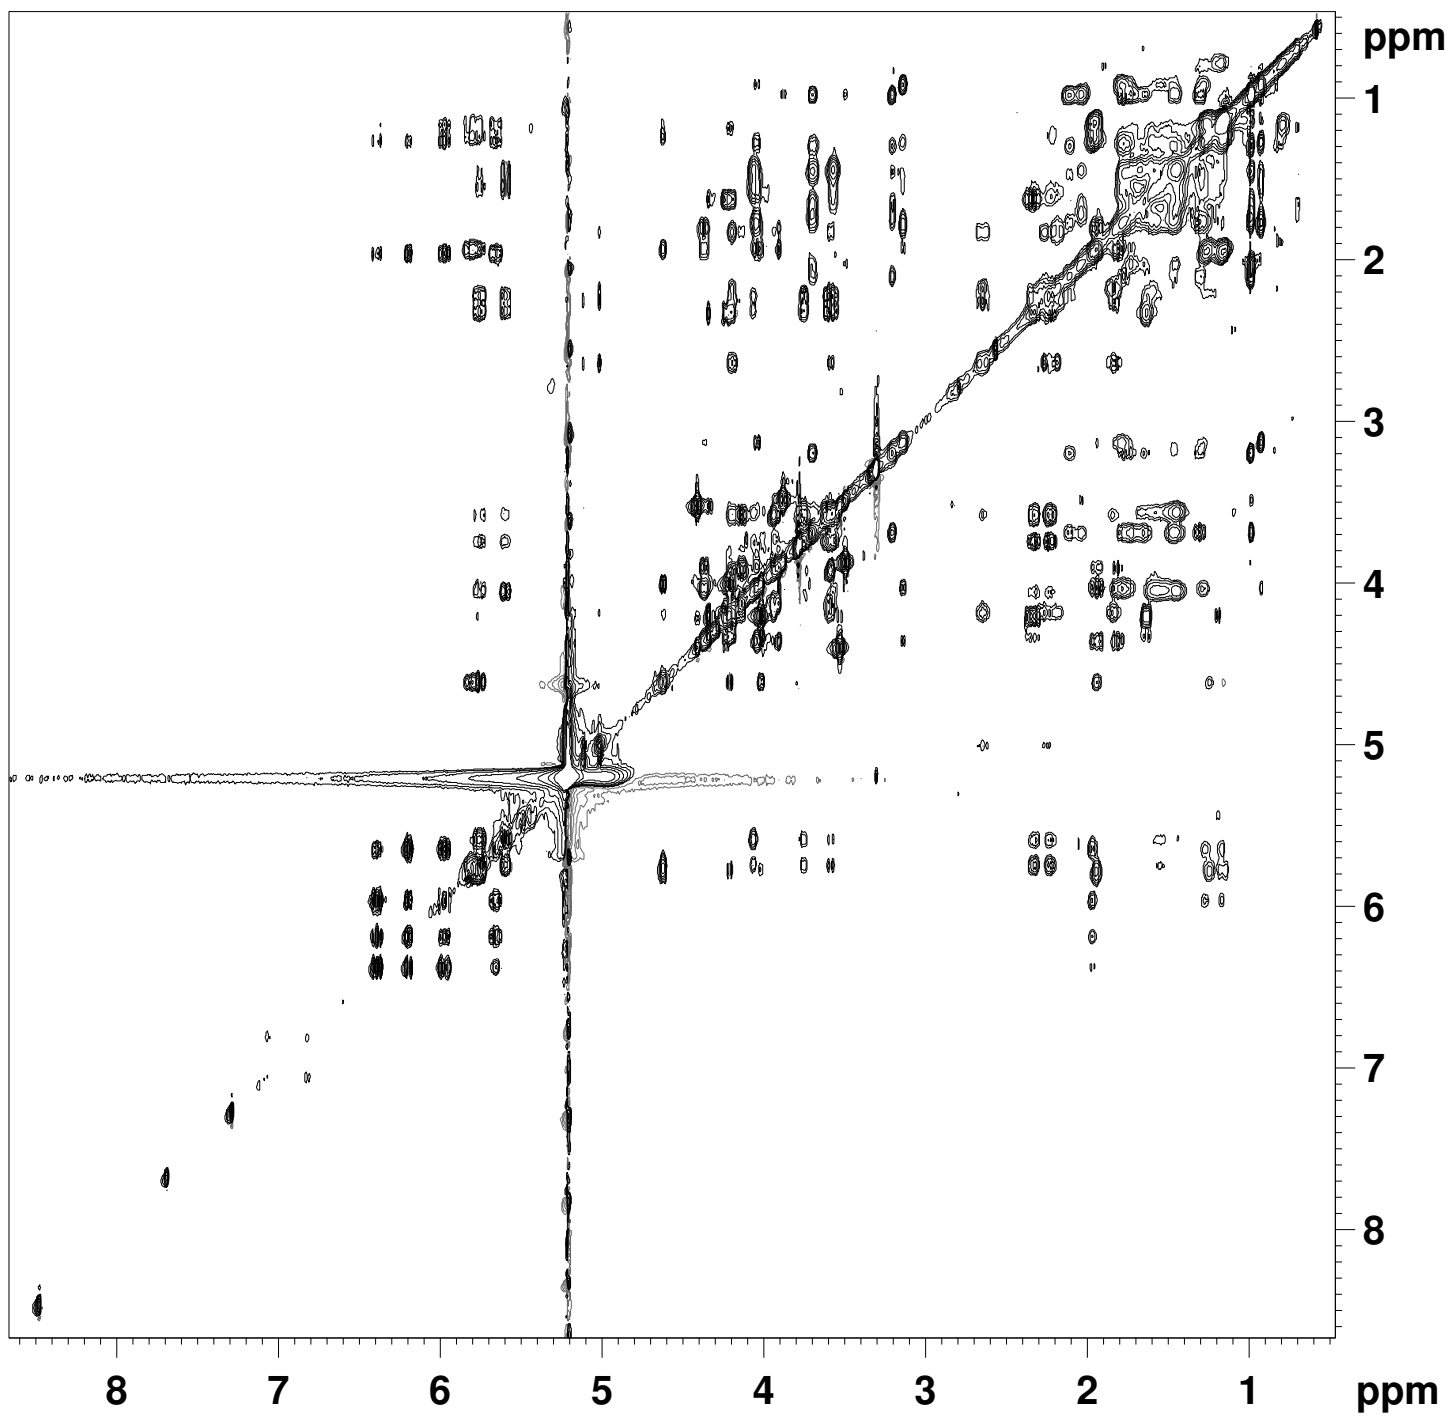

Figure S17. TOCSY spectrum of 65-*E*-chloro-KmTx 1 (**6**).

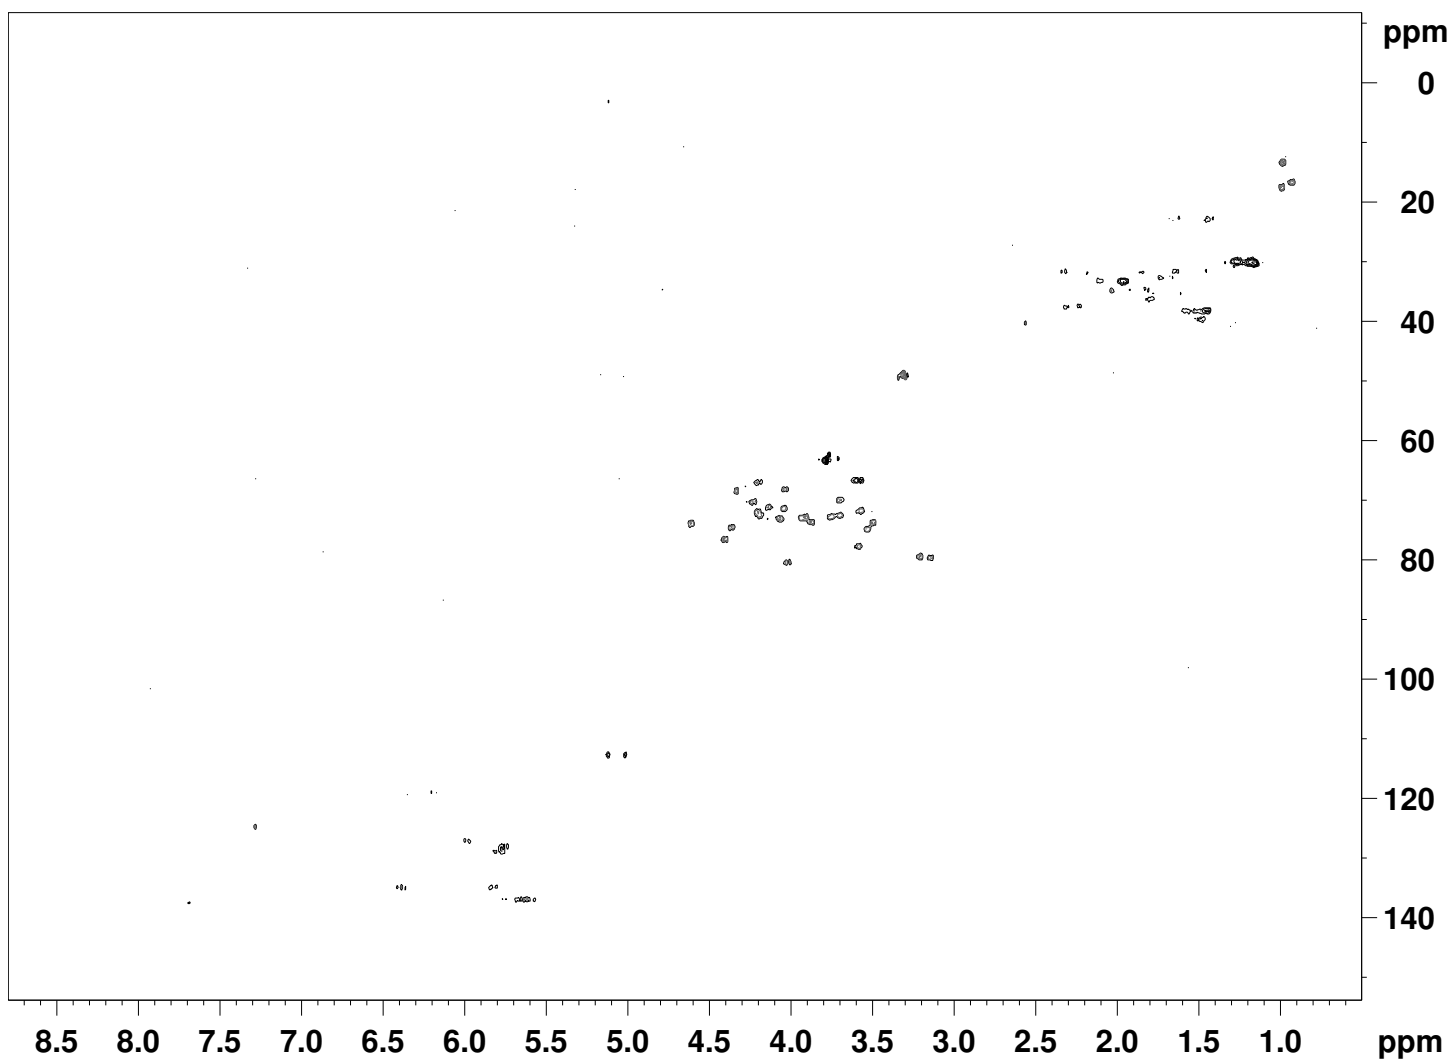

Figure S18. HSQC spectrum of 65-*E*-chloro-KmTx 1 (**6**).

## NMR spectra of 10-*O*-sulfo-KmTx 1 (7)

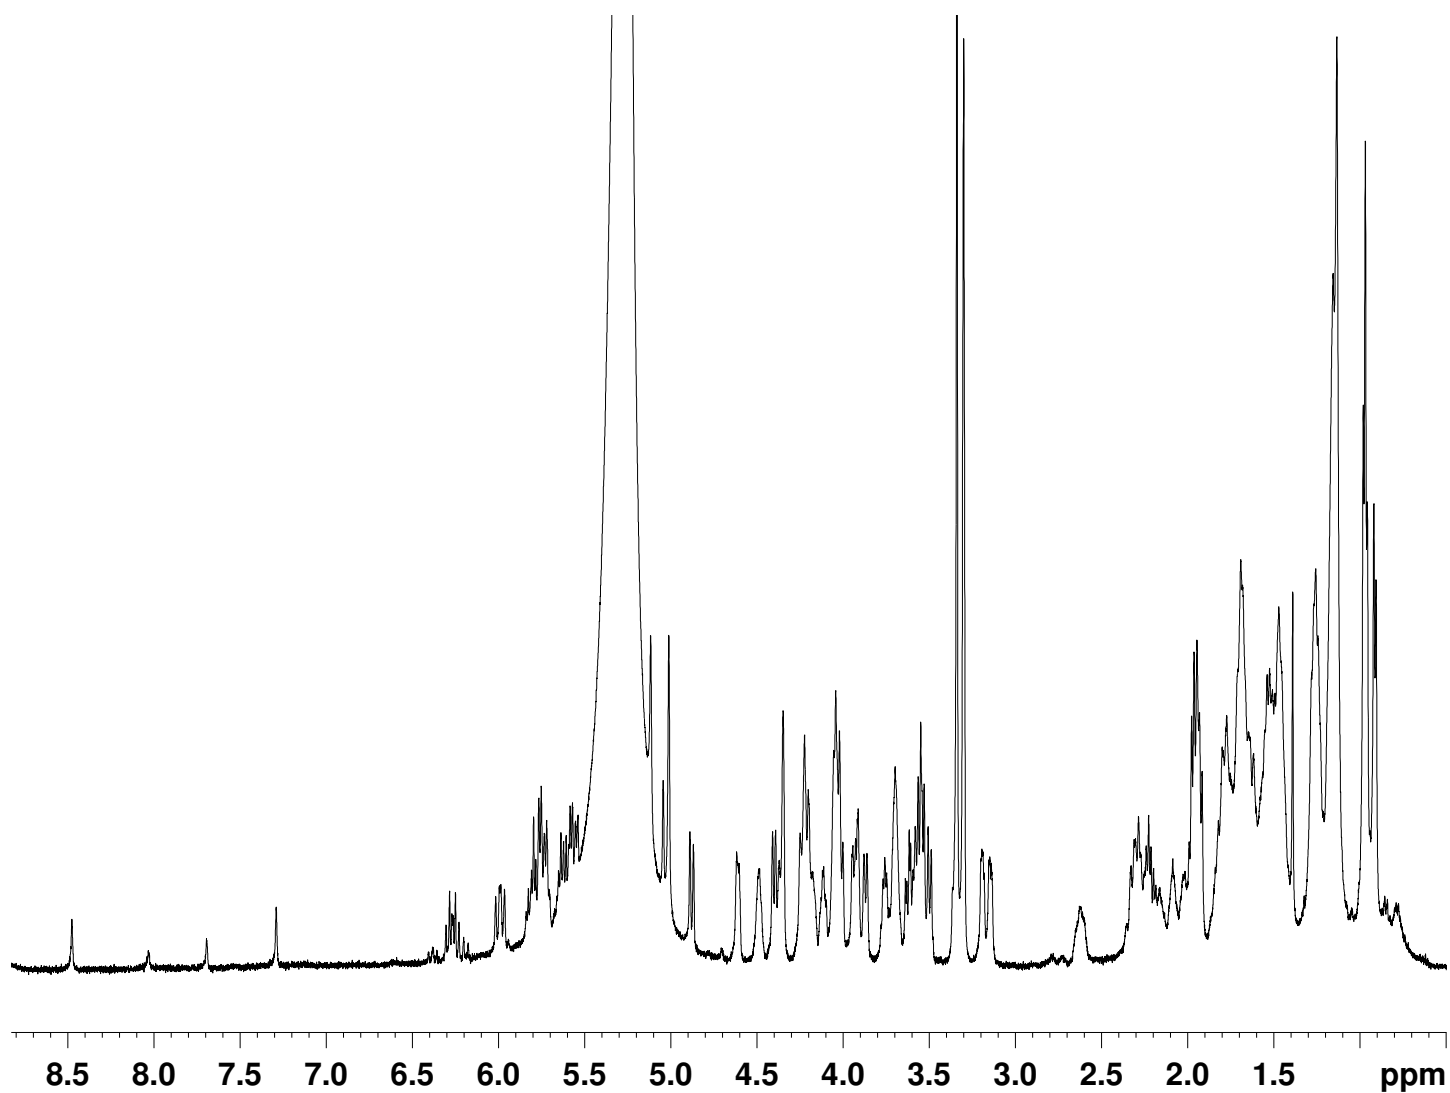

Figure S19. <sup>1</sup>H NMR spectrum of 10-*O*-sulfo-KmTx 1 (7).

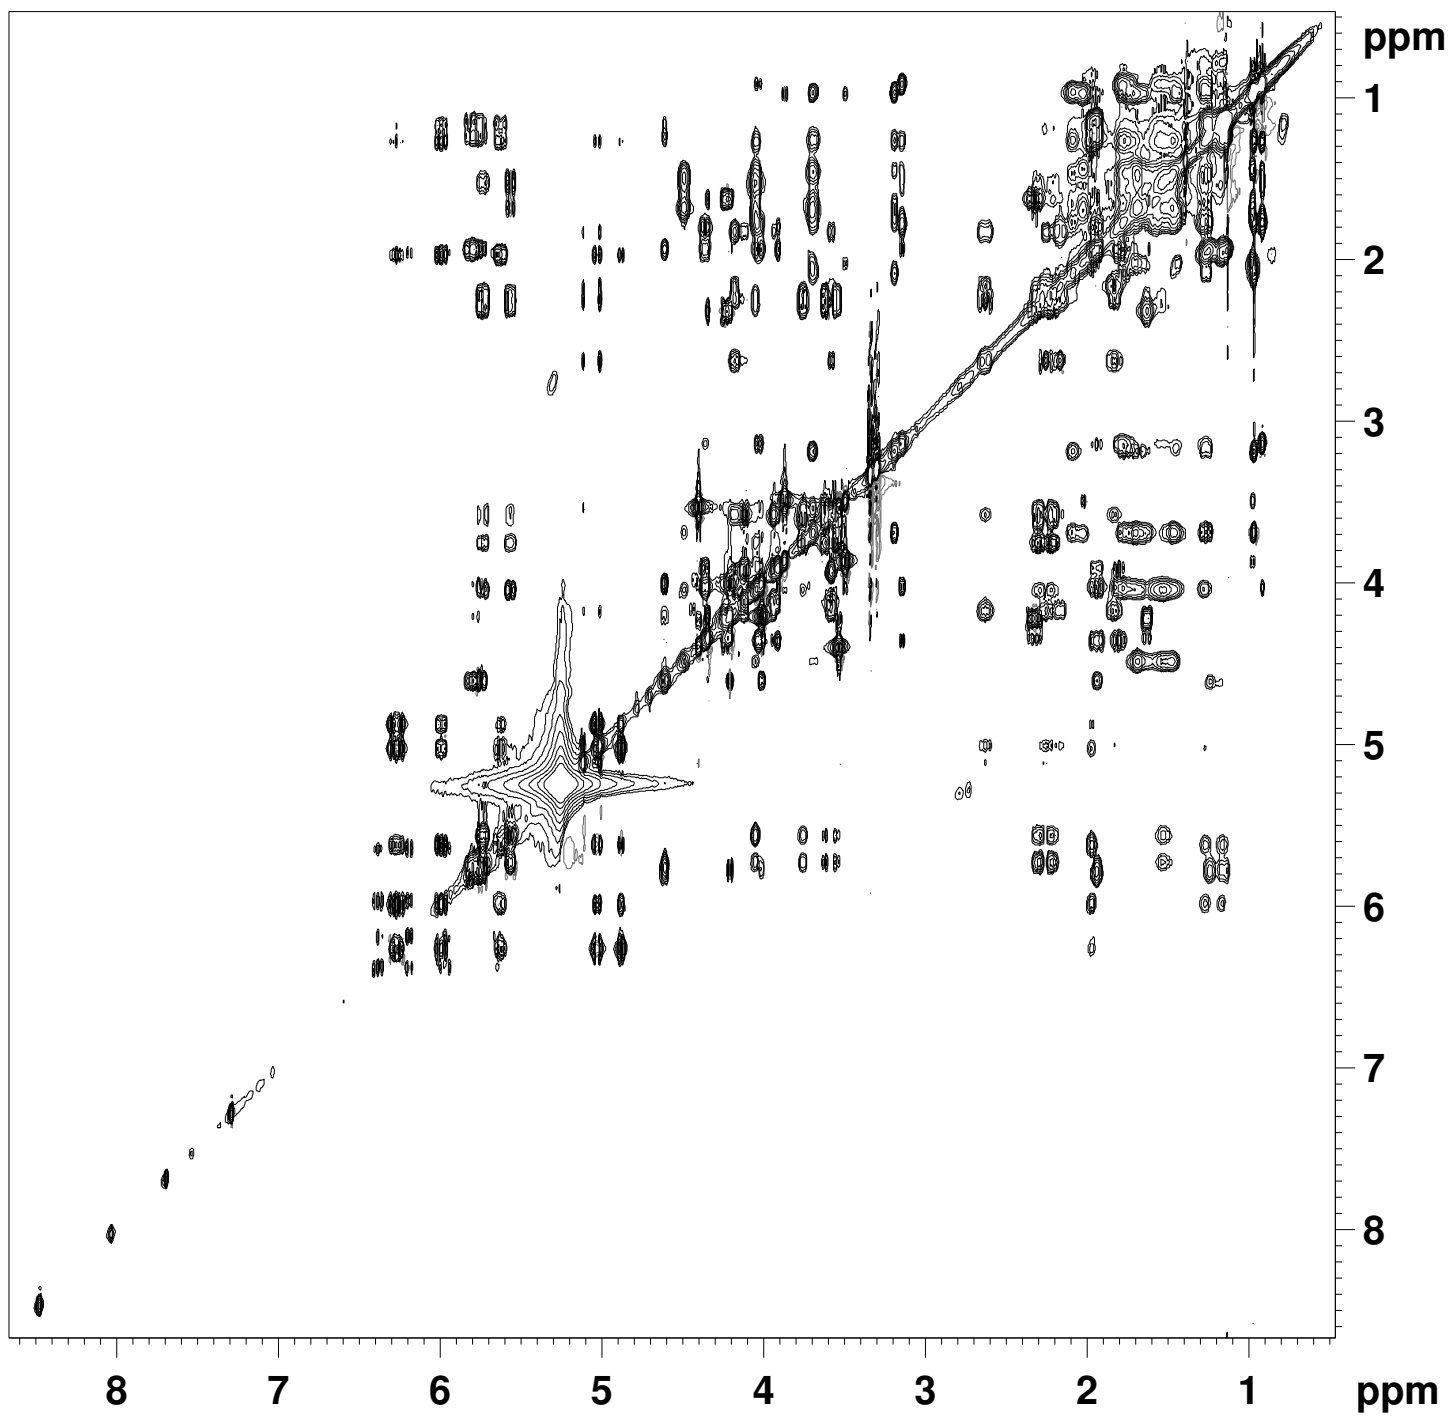

Figure S20. TOCSY spectrum of 10-*O*-sulfo-KmTx 1 (7).

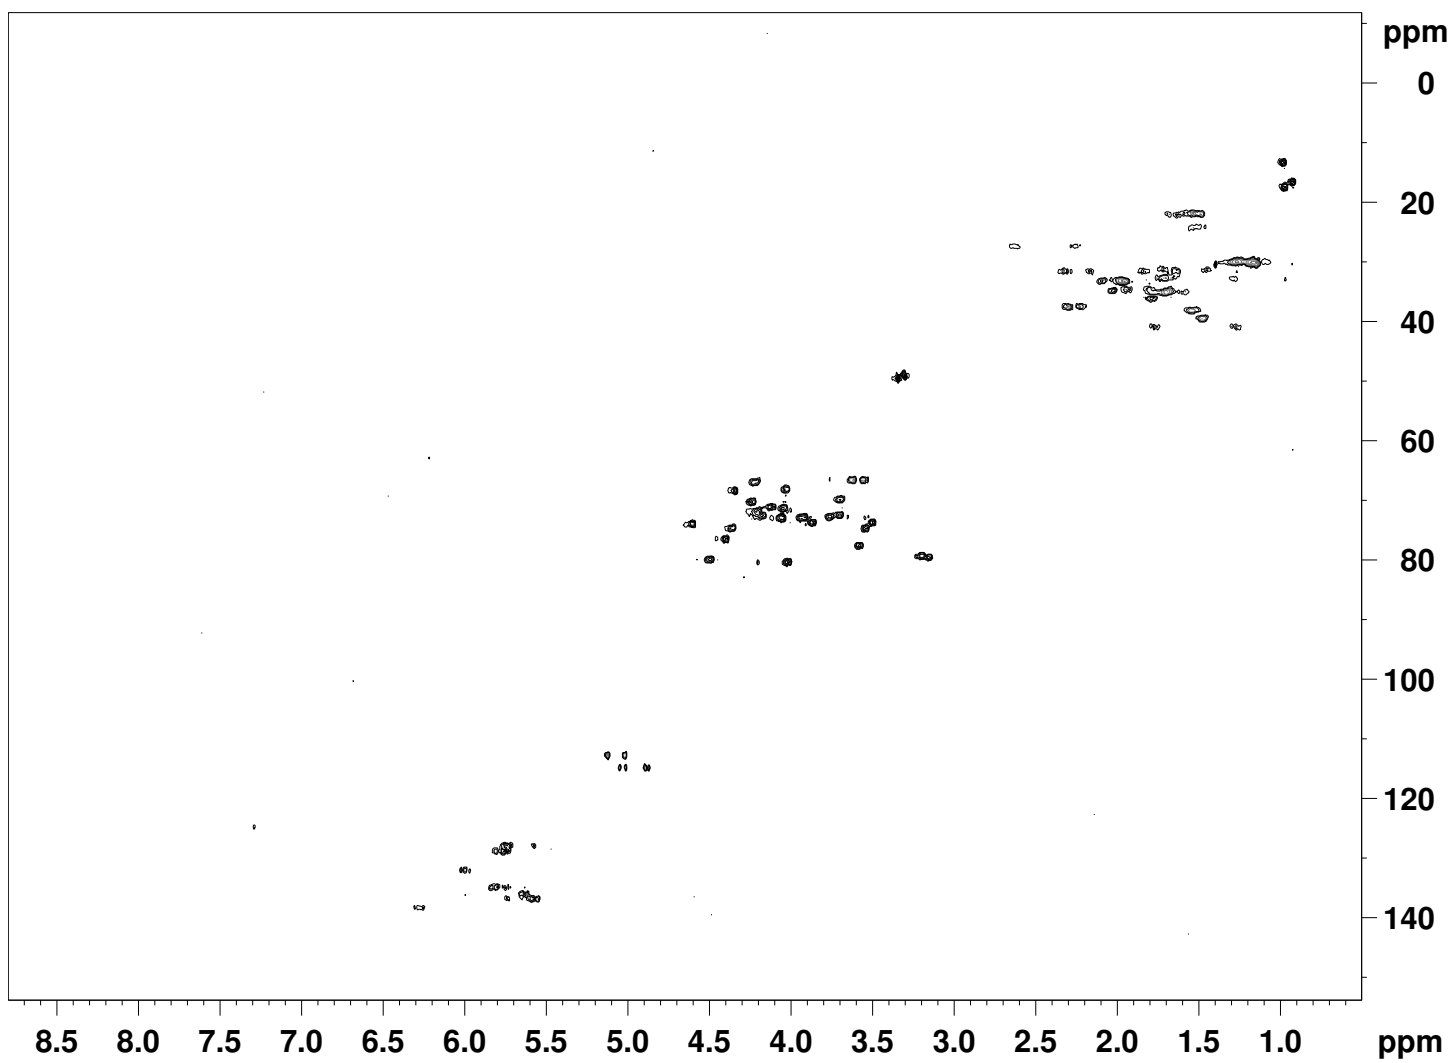

Figure S21. HSQC spectrum of 10-*O*-sulfo-KmTx 1 (7).

# Mass spectral data for the karlotoxins

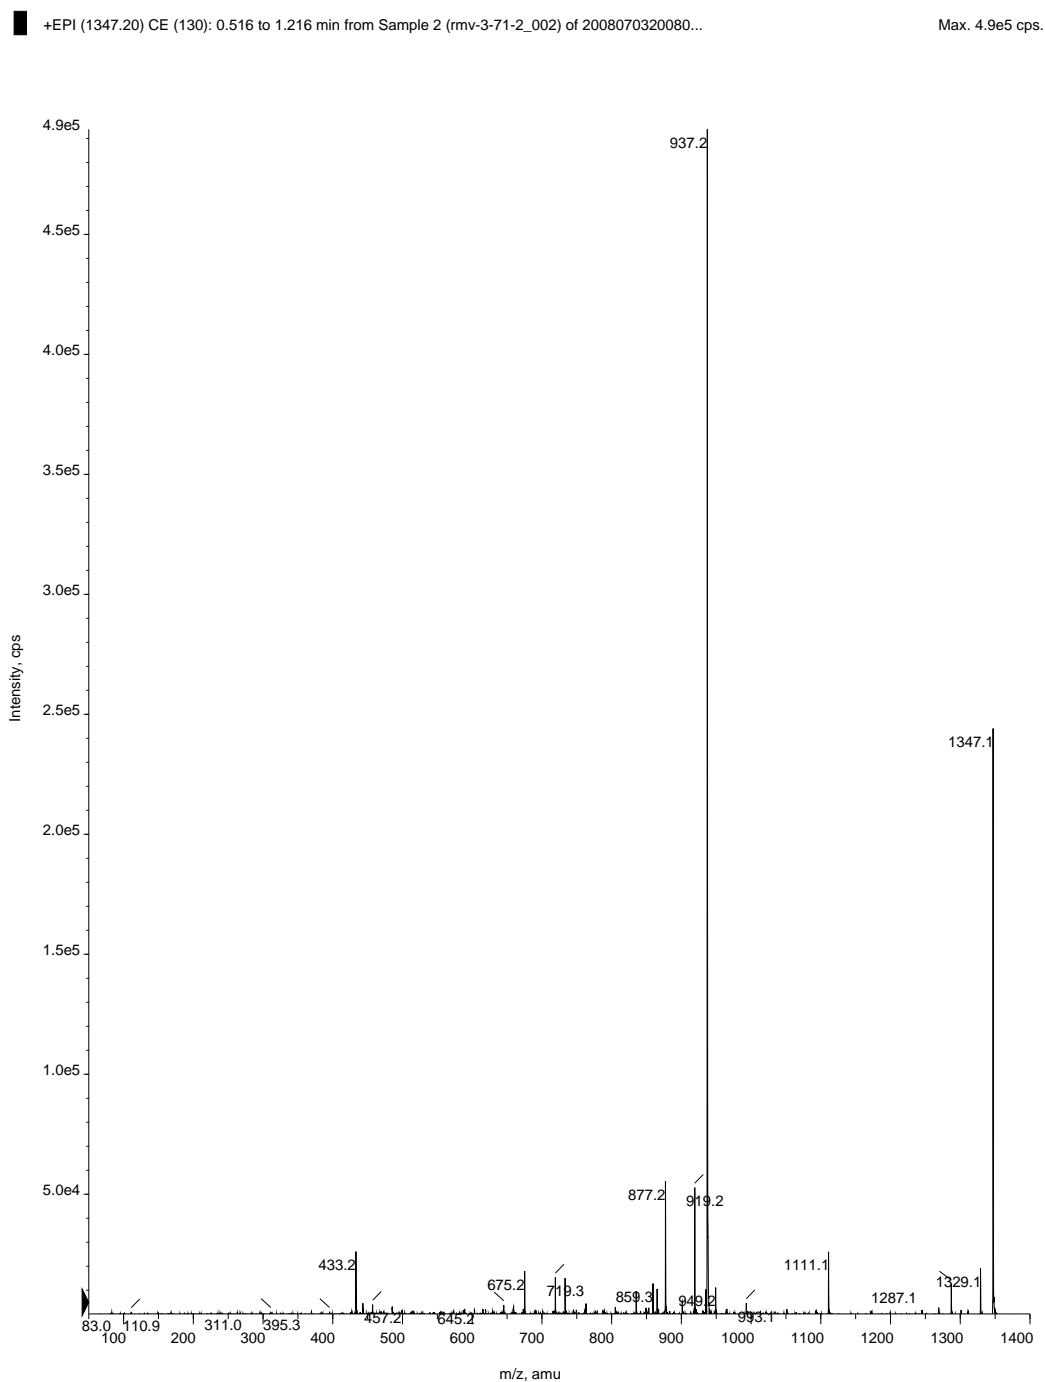

Figure S22. EPI mass spectrum for KmTx 3 (**3**).

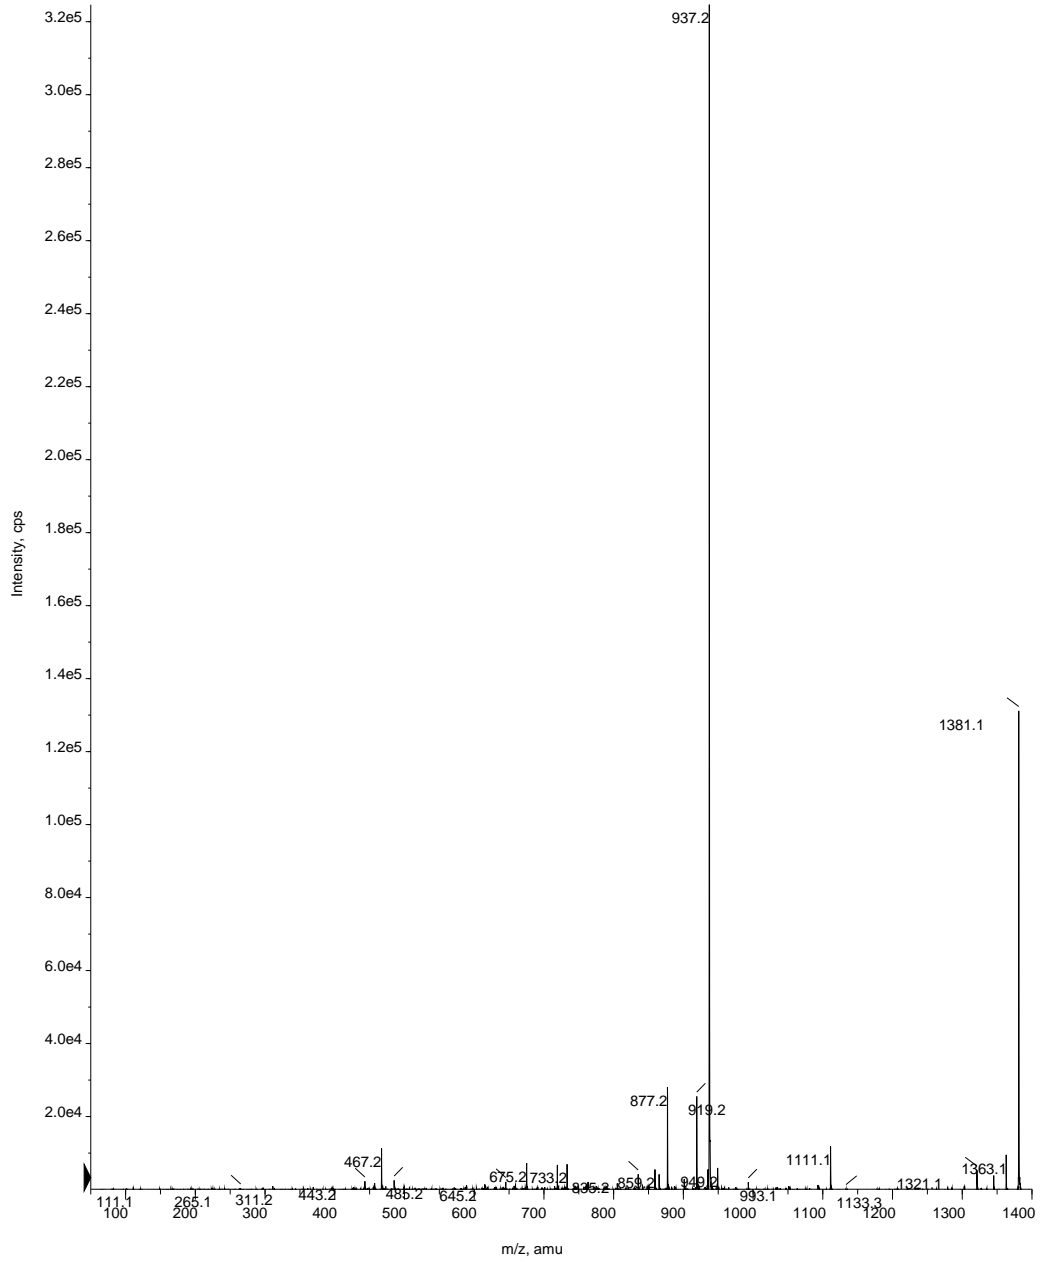

Figure S23. EPI mass spectrum for 64-*E*-chloro-KmTx 3 (4).



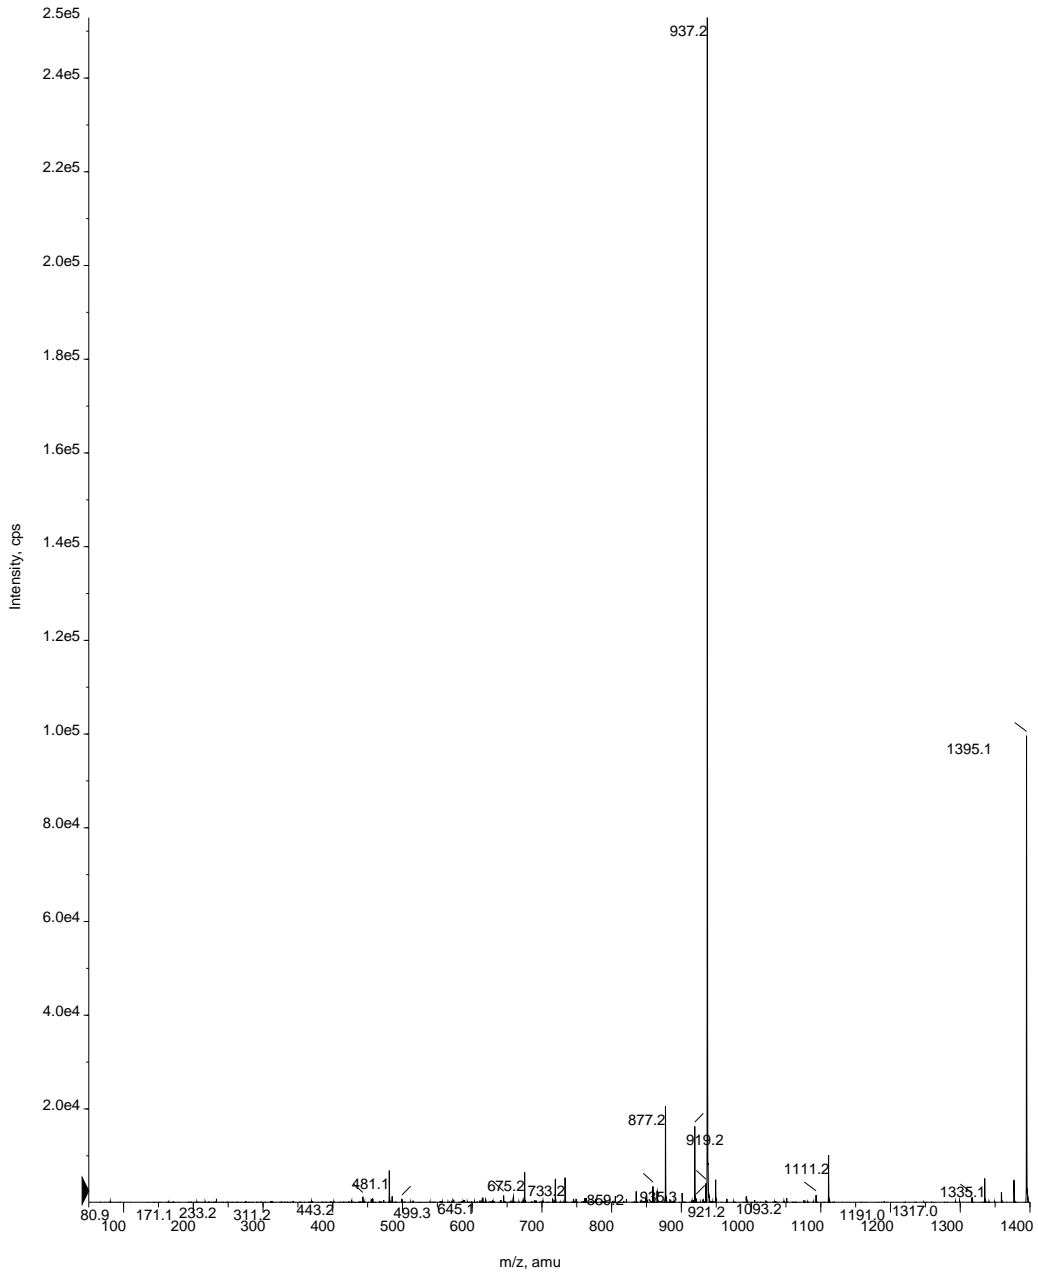

Figure S24. EPI mass spectrum for 65-*E*-chloro-KmTx 1 (6).

Single Mass Analysis

Tolerance = 10.0 PPM / DBE: min = -1.5, max = 100.0

Selected filters: None

Monoisotopic Mass, Even Electron Ions

36 formula(e) evaluated with 1 results within limits (up to 50 closest results for each mass)

Elements Used:

C: 0-150 H: 0-200 O: 23-25

Ryan Van Wagoner, RMV3-71-2

Mass Spec Lab, SCS, University of Illinois

QTOF

Qtof\_19553a 28 (2.009) AM (Cen,3, 80.00, Ar,14000.0,716.46,0.70,LS 3); Sm (SG, 2x3.00); Cm (27:28)

1: TOF MS ES+

730

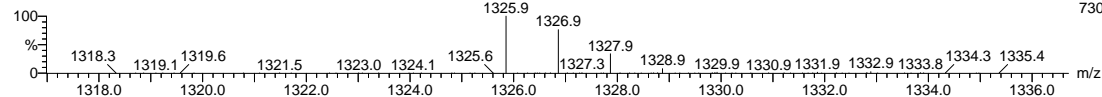

Minimum: -1.5  
Maximum: 5.0 10.0 100.0

| Mass      | Calc. Mass | mDa  | PPM  | DBE | i-FIT | Formula      |
|-----------|------------|------|------|-----|-------|--------------|
| 1325.8534 | 1325.8561  | -2.7 | -2.0 | 6.5 | 0.2   | C68 H125 O24 |

Figure S25. High-resolution mass spectrum for KmTx 3 (3).

## Single Mass Analysis

Tolerance = 10.0 PPM / DBE: min = -1.5, max = 100.0

Selected filters: None

Monoisotopic Mass, Even Electron Ions

75 formula(e) evaluated with 2 results within limits (up to 50 closest results for each mass)

Elements Used:

C: 0-150 H: 0-200 O: 23-25 Cl: 0-1

Ryan Van Wagoner, RMV3-71-3

Mass Spec Lab, SCS, University of Illinois

Qtof\_19554a 29 (2.080) AM (Cen,3, 80.00, Ar,14000.0,716.46,0.70,LS 3); Sm (SG, 2x3.00); Cm (21:29)

QTOF  
1: TOF MS ES+  
639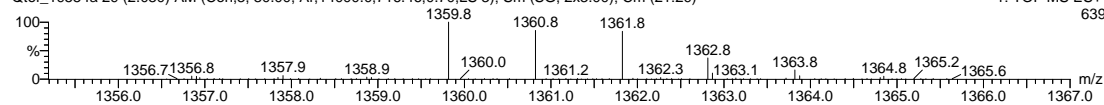

Minimum: -1.5  
Maximum: 5.0 10.0 100.0

| Mass      | Calc. Mass | mDa  | PPM  | DBE  | i-FIT | Formula         |
|-----------|------------|------|------|------|-------|-----------------|
| 1359.8165 | 1359.8171  | -0.6 | -0.4 | 6.5  | 7.0   | C68 H124 O24 Cl |
|           | 1359.8040  | 12.5 | 9.2  | 11.5 | 74.4  | C70 H119 O25    |

Figure S26. High-resolution mass spectrum for 64-*E*-chloro-KmTx 3 (4).

Single Mass Analysis

Tolerance = 10.0 PPM / DBE: min = -1.5, max = 100.0

Selected filters: None

Monoisotopic Mass, Even Electron Ions

74 formula(e) evaluated with 2 results within limits (up to 50 closest results for each mass)

Elements Used:

C: 0-150 H: 0-200 O: 26-28 S: 0-1

Ryan Van Wagoner, RMV3-83-1

Mass Spec Lab, SCS, University of Illinois

QTOF

Qtof\_19557b 30 (2.130) AM (Cen,5, 80.00, Ar,14000.0,716.46,0.70,LS 3); Sm (SG, 2x5.00); Cm (30:35)

1: TOF MS ES+

338

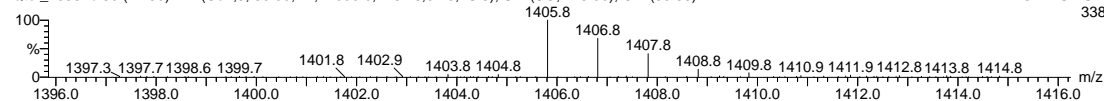

Minimum: -1.5  
Maximum: 5.0 10.0 100.0

| Mass      | Calc. Mass | mDa  | PPM  | DBE  | i-FIT | Formula        |
|-----------|------------|------|------|------|-------|----------------|
| 1405.8108 | 1405.8095  | 1.3  | 0.9  | 11.5 | 3.5   | C71 H121 O27   |
|           | 1405.8129  | -2.1 | -1.5 | 6.5  | 2.0   | C68 H125 O27 S |

Figure S27. High-resolution mass spectrum for 10-O-sulfo-KmTx 3 (5).

## Single Mass Analysis

Tolerance = 10.0 PPM / DBE: min = -1.5, max = 100.0

Selected filters: None

Monoisotopic Mass, Even Electron Ions

76 formula(e) evaluated with 1 results within limits (up to 50 closest results for each mass)

Elements Used:

C: 0-150 H: 0-200 O: 23-25 Cl: 0-1

Ryan Van Wagoner, RMV3-71-7

Mass Spec Lab, SCS, University of Illinois

Qtof\_19556c 15 (1.069) AM (Cen,3, 80.00, Ar,14000.0,716.46,0.70,LS 3); Sm (SG, 2x3.00)

QTOF  
1: TOF MS ES+  
1.56e3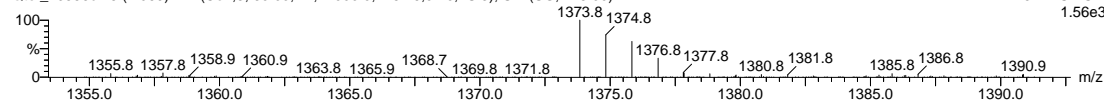

Minimum: -1.5  
Maximum: 5.0 10.0 100.0

| Mass      | Calc. Mass | mDa | PPM | DBE | i-FIT | Formula         |
|-----------|------------|-----|-----|-----|-------|-----------------|
| 1373.8344 | 1373.8328  | 1.6 | 1.2 | 6.5 | 2.8   | C69 H126 O24 Cl |

Figure S28. High-resolution mass spectrum for 65-E-chloro-KmTx 1 (6).

Single Mass Analysis

Tolerance = 10.0 PPM / DBE: min = -1.5, max = 100.0

Selected filters: None

Monoisotopic Mass, Even Electron Ions

76 formula(e) evaluated with 2 results within limits (up to 50 closest results for each mass)

Elements Used:

C: 0-150 H: 0-200 O: 26-28 S: 0-1

Ryan Van Wagoner, RMV3-83-2

Mass Spec Lab, SCS, University of Illinois

QTOF

Qtof\_19558c 18 (1.281) AM (Cen,5, 80.00, Ar,14000.0,716.46,0.70,LS 3); Sm (SG, 2x5.00); Cm (18:20)

1: TOF MS ES+

4.64e3

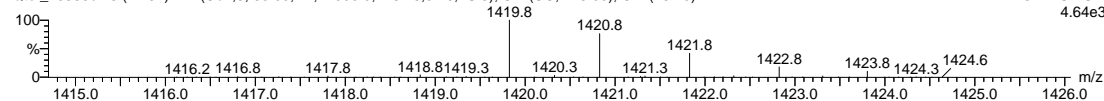

Minimum: -1.5  
 Maximum: 5.0 10.0 100.0

| Mass      | Calc. Mass | mDa  | PPM  | DBE  | i-FIT | Formula        |
|-----------|------------|------|------|------|-------|----------------|
| 1419.8248 | 1419.8252  | -0.4 | -0.3 | 11.5 | 14.1  | C72 H123 O27   |
|           | 1419.8285  | -3.7 | -2.6 | 6.5  | 3.5   | C69 H127 O27 S |

Figure S29. High-resolution mass spectrum for 10-O-sulfo-KmTx 1 (7).

## Hemolytic assays of the karlotoxins.

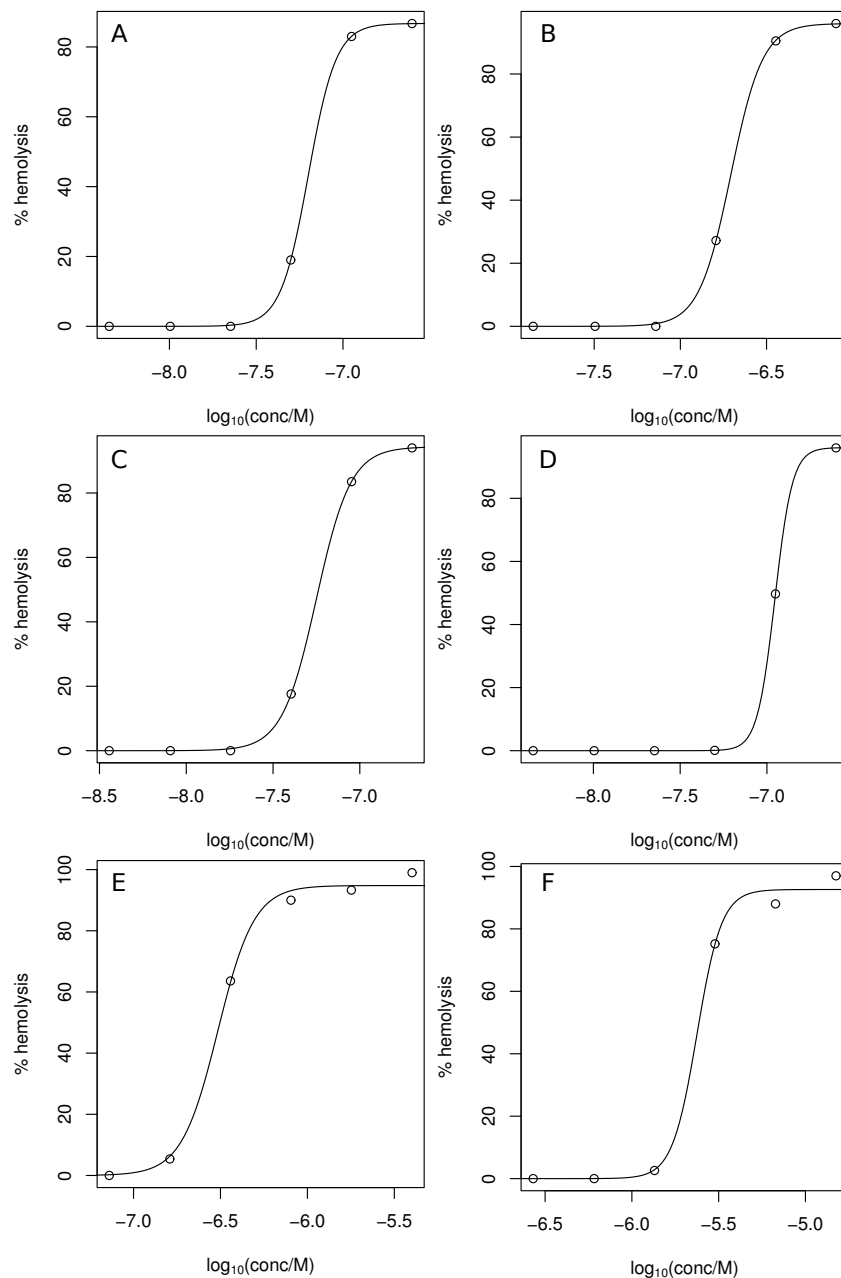

Figure S30. Hemolytic activity of the karlotoxins. Also shown are the fitted  $EC_{50}$  curves for each compound. Data points represent an average of three replicates. A- KmTx 1. B- KmTx 3. C- 65-*E*-chloro-KmTx 1. D- 64-*E*-chloro-KmTx 3. E- 10-*O*-sulfo-KmTx 1. F- 10-*O*-sulfo-KmTx 3.
